# Supplementary material
Source: PubMed Central journal article supplement (PMC7098714)
Supplement: jciinsight-5-129531-s010.pdf [file jciinsight-5-129531-s010.pdf]

## Supplemental Figures and Tables

|                            |       |
|----------------------------|-------|
| Supplemental Figure 1..... | 2     |
| Supplemental Figure 2..... | 3-6   |
| Supplemental Figure 3..... | 7     |
| Supplemental Figure 4..... | 8-9   |
| Supplemental Figure 5..... | 10-13 |
| Supplemental Figure 6..... | 14-16 |
| Supplemental Figure 7..... | 17-20 |
| Supplemental Table 1.....  | 21    |
| Supplemental Table 2.....  | 22-31 |
| Supplemental Table 3.....  | 32    |
| Supplemental Table 4.....  | 33-45 |

Supplemental Figures

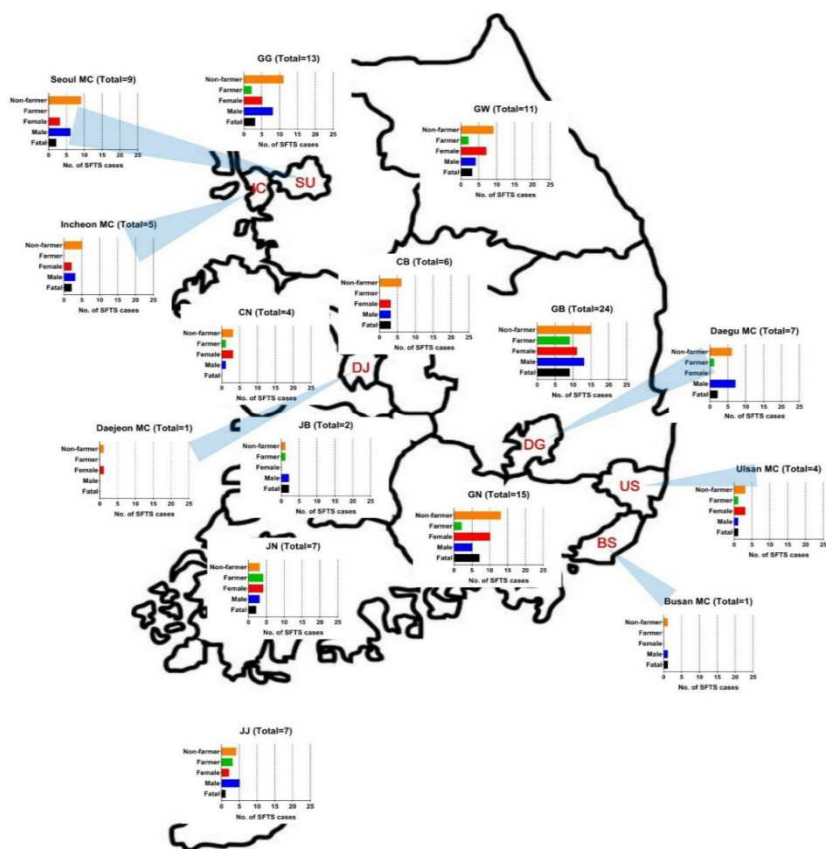

**Supplemental Figure 1.** A map summarizing the regional characteristics of isolated SFTS cases analyzed in this study. Gyeonggi Province (GG), Gangwon Province (GW), Chungcheongnam Province (CN), Chungcheongbuk Province (CB), Gyeongsangnam Province (GN), Gyeongsangbuk Province (GB), Jeollanam Province (JN), Jeollabuk Province (JB), Jeju Special Autonomous Province (JJ), Seoul (SU) metropolitan city [MC], Incheon (IC) MC, Daejeon (DJ) MC, Daegu (DG) MC, Ulsan (US) MC, Busan (BS) MC.

## Supplemental data

**Supplemental Figure 2.** The full version of the Maximum Likelihood (ML) trees of Figure 2. Phylogenetic analysis based on the complete ORF sequences of (A) *L*, (B) *M*, and (C) *S* segments of Korean SFTSVs compared with those from China and Japan. The full version of the Maximum Likelihood (ML) trees based on the Kimura 2-parameter model were constructed and tested by bootstrap analysis with 1,000 replications. The scale bar indicates the number of nucleotide substitutions per site, and the phylogenetic branches were supported with greater than 70% bootstrap values. The SFTSV strains from China, Japan, and South Korea are marked with black, red, and blue closed circles, respectively.



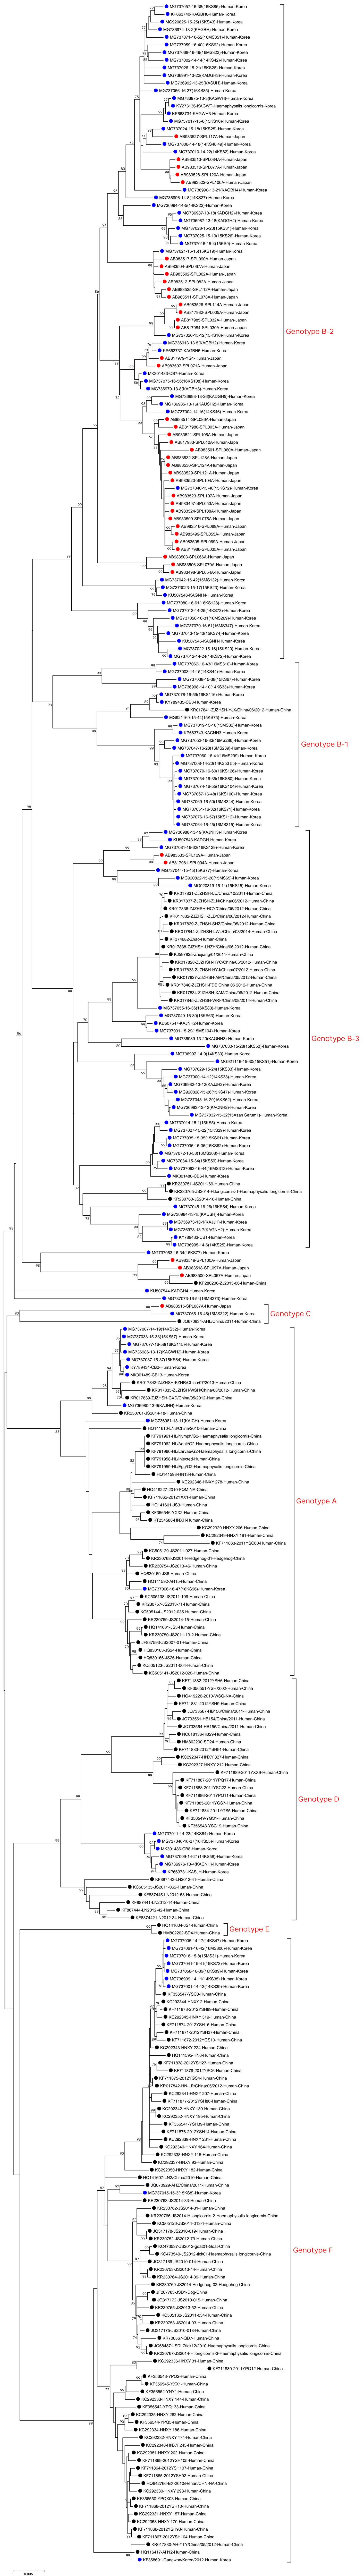



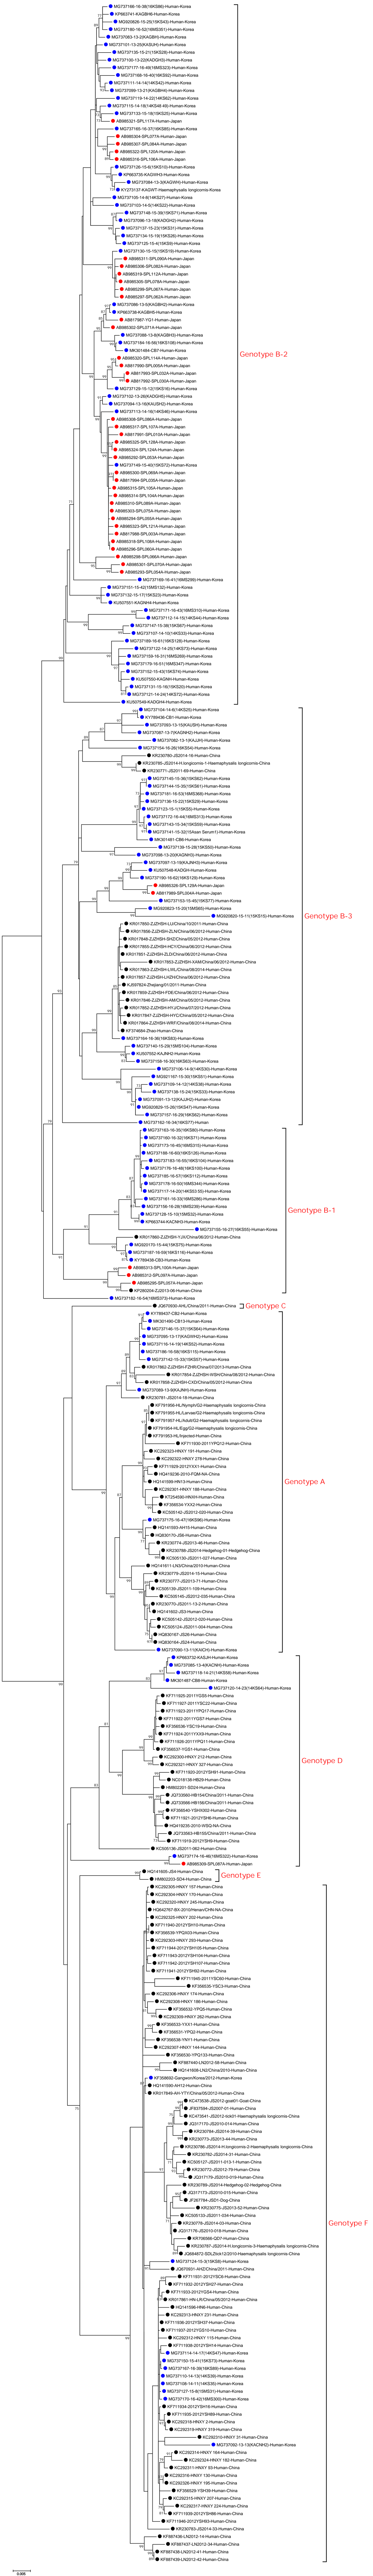



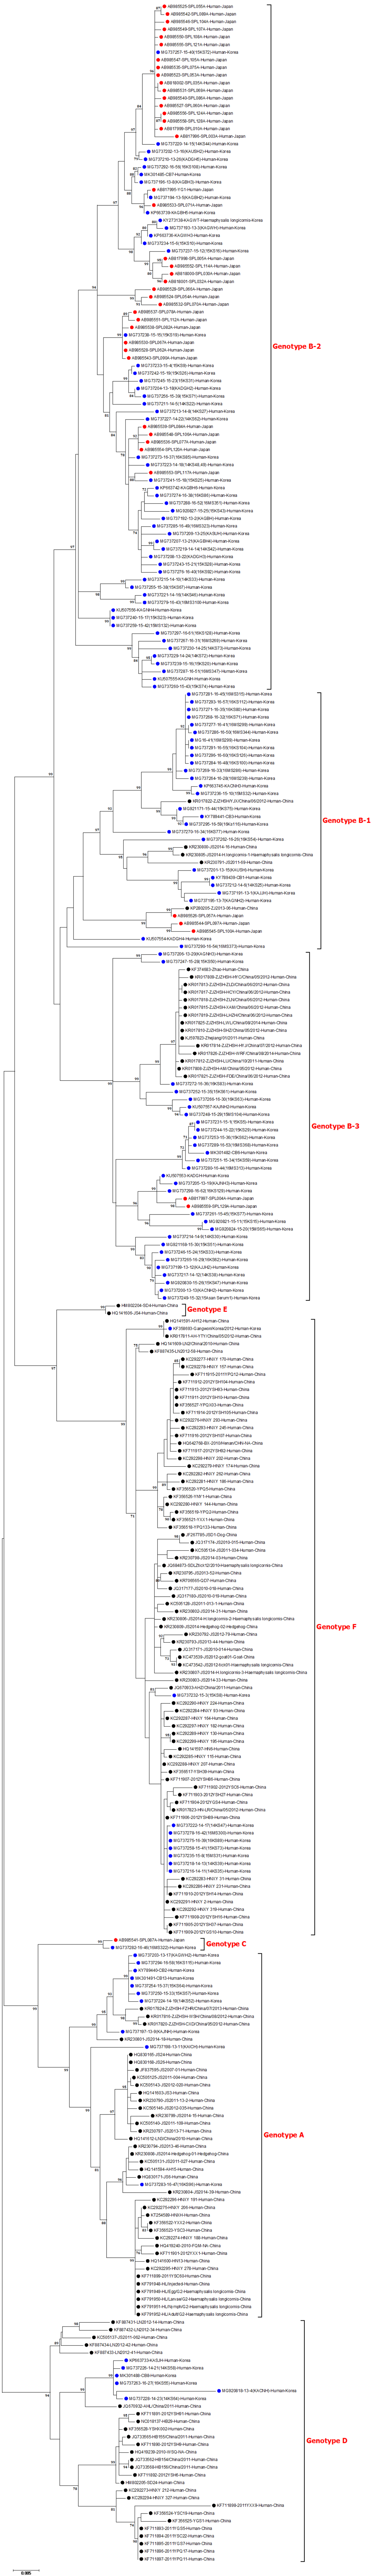

Genotype B-2

Genotype B-1

Genotype B-3

Genotype E

Genotype F

Genotype C

Genotype A

Genotype D

0.005



## Supplemental data

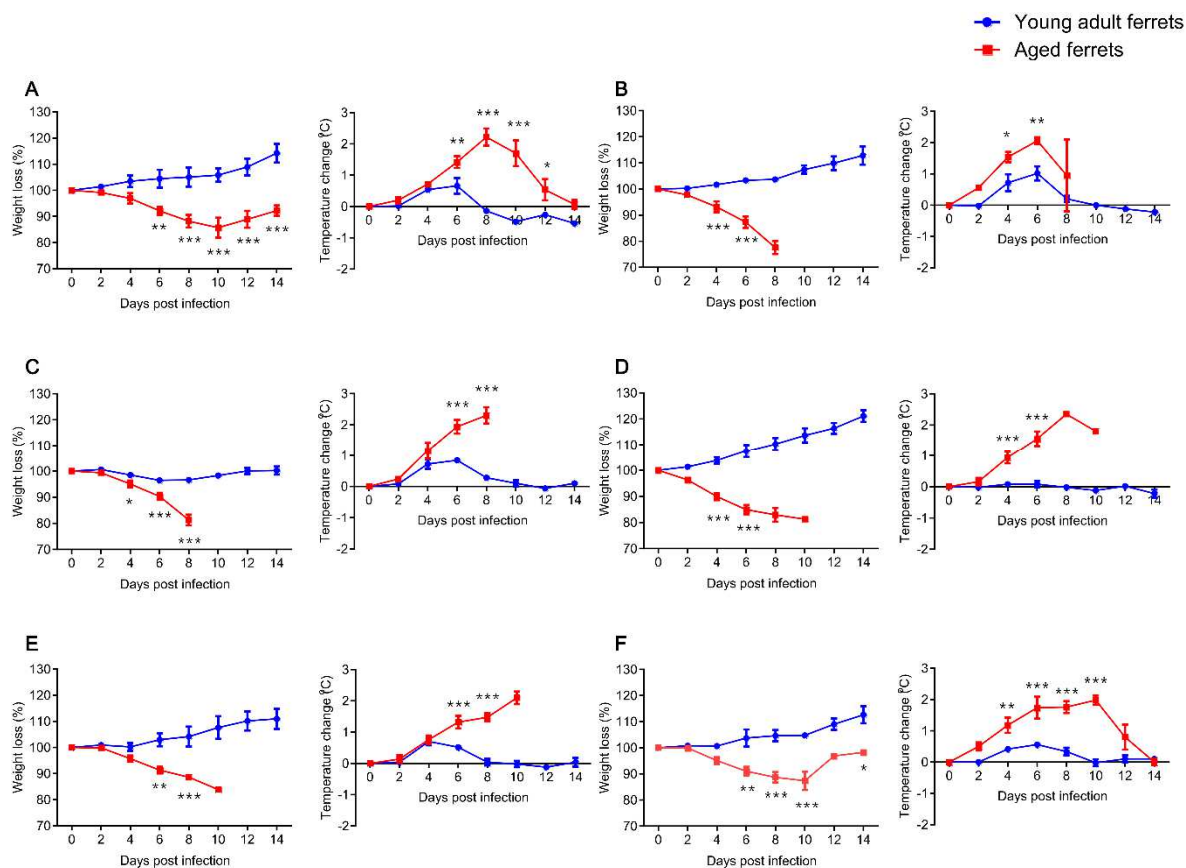

**Supplemental Figure 3.** Pathogenicity of each randomly selected SFTSV pure genotype in ferrets. Young adult (< 2 years, n=5) or aged female and male ferrets (> 4 years, n=5) were inoculated with  $10^{5.0}$  FFU/ml of each randomly selected SFTSV strain (A) A, (B) B-1, (C) B-2, (D) B-3, (E) D, (F) F. Body weight loss (first lane) and body temperature change (second lane) were assessed. Both weight loss and temperature change are presented as mean  $\pm$  SEM. Comparison between results in young adult and aged ferrets is represented in blue and red, respectively. Asterisks indicate statistical significance between infected young adult or aged ferrets and infected ferrets per day post-infection as determined by two way ANOVA with Sidak comparison tests (\* indicates  $p < 0.05$ , and \*\* indicate  $p < 0.001$ , \*\*\* indicate  $p < 0.0001$ ).

# Supplemental data

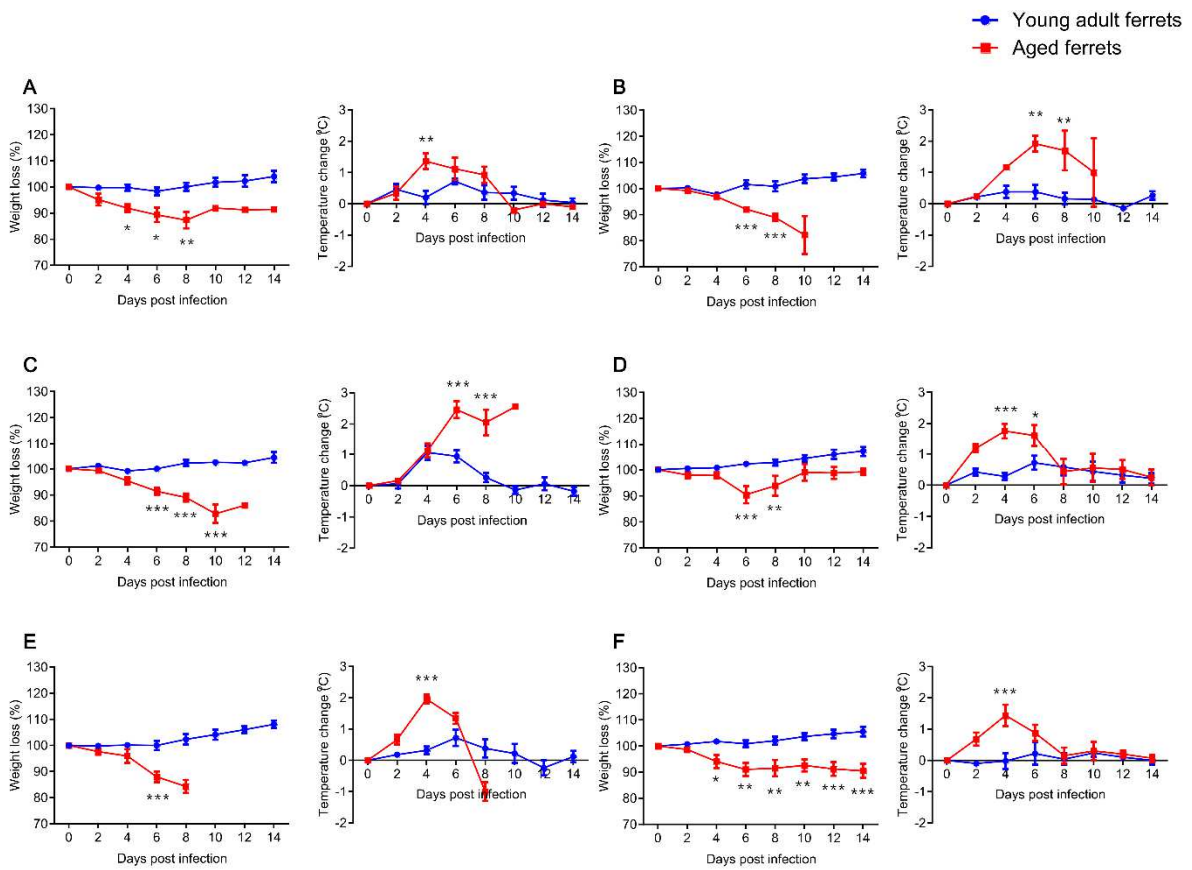



## Supplemental data

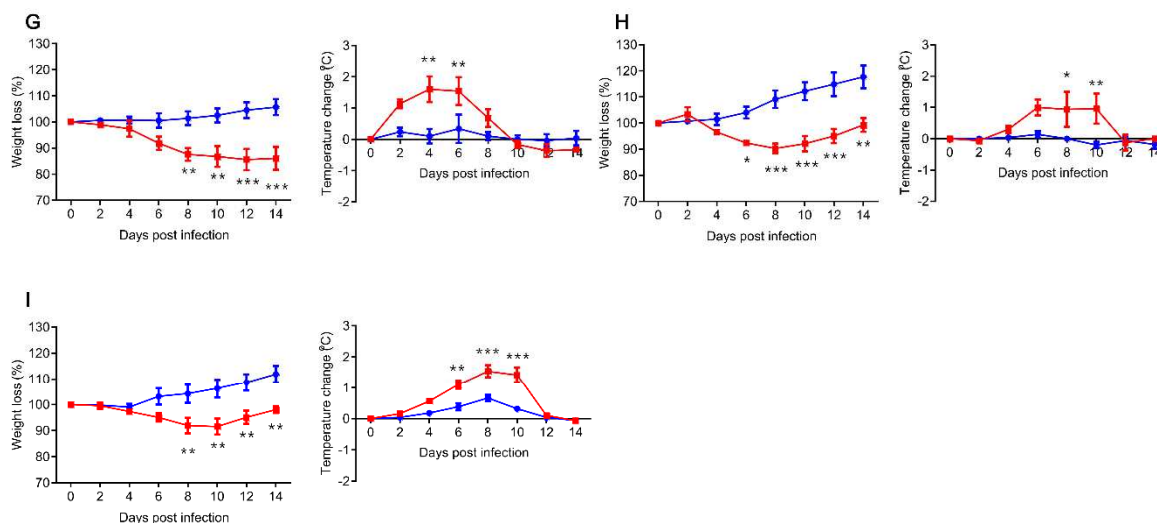

**Supplemental Figure 4.** Pathogenicity of each randomly selected SFTSV reassortant genotype in ferrets. Young adult (< 2 years, n=5) or aged female and male ferrets (> 4 years, n=5) were inoculated with  $10^{5.0}$  FFU/ml of each randomly selected SFTSV strain (A) R-1, (B) R-2, (C) R-3, (D) R-4, (E) R-5, (F) R-6, (G) R-7, (H) R-8 and (I) R-9. Body weight loss (first lane) and body temperature change (second lane) were assessed. Both weight loss and temperature change are presented as mean  $\pm$  SEM. Comparison between results in young adult and aged ferrets is represented in blue and red, respectively. Asterisks indicate statistical significance between infected young adult and infected aged ferrets per day post-infection as determined by two way ANOVA with Sidak comparison tests (\* indicates  $p < 0.05$ , and \*\* indicate  $p < 0.001$ , \*\*\* indicate  $p < 0.0001$ ).



# Supplemental data

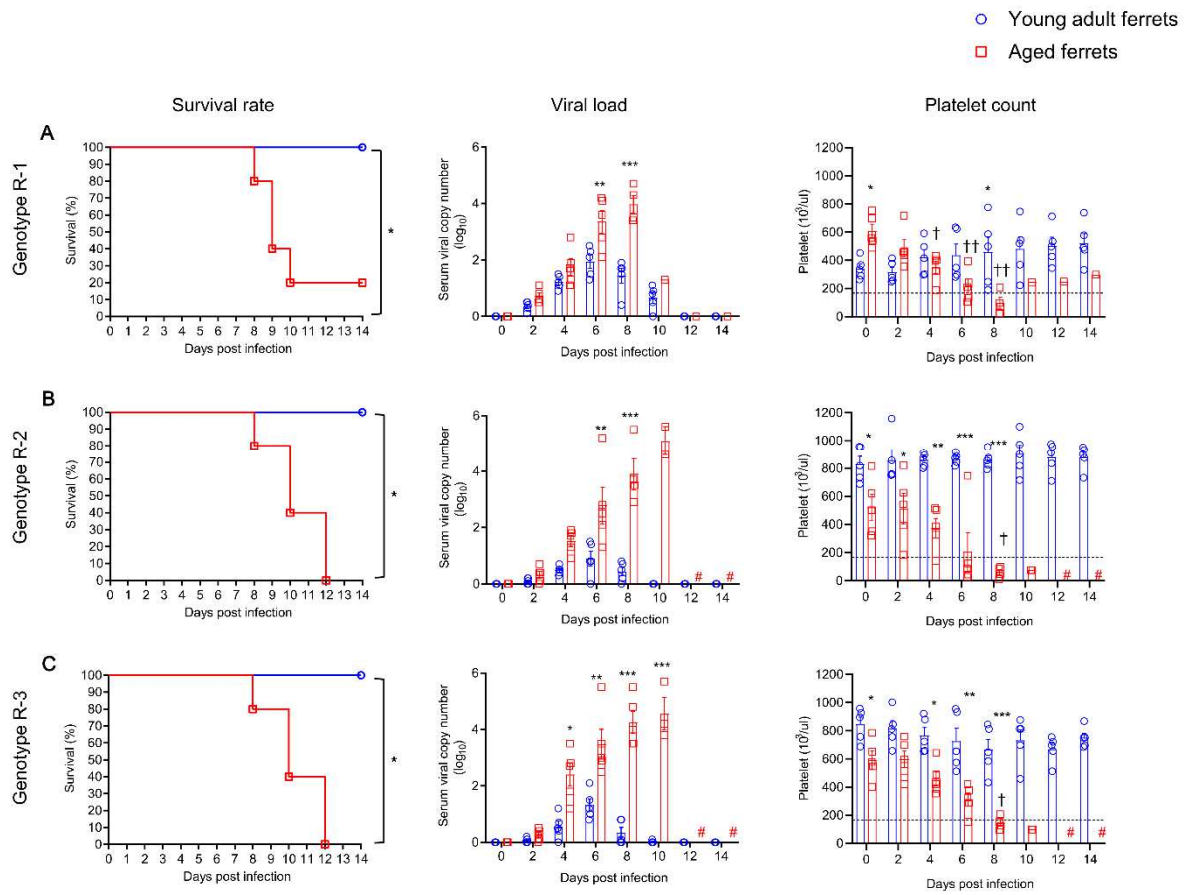



# Supplemental data

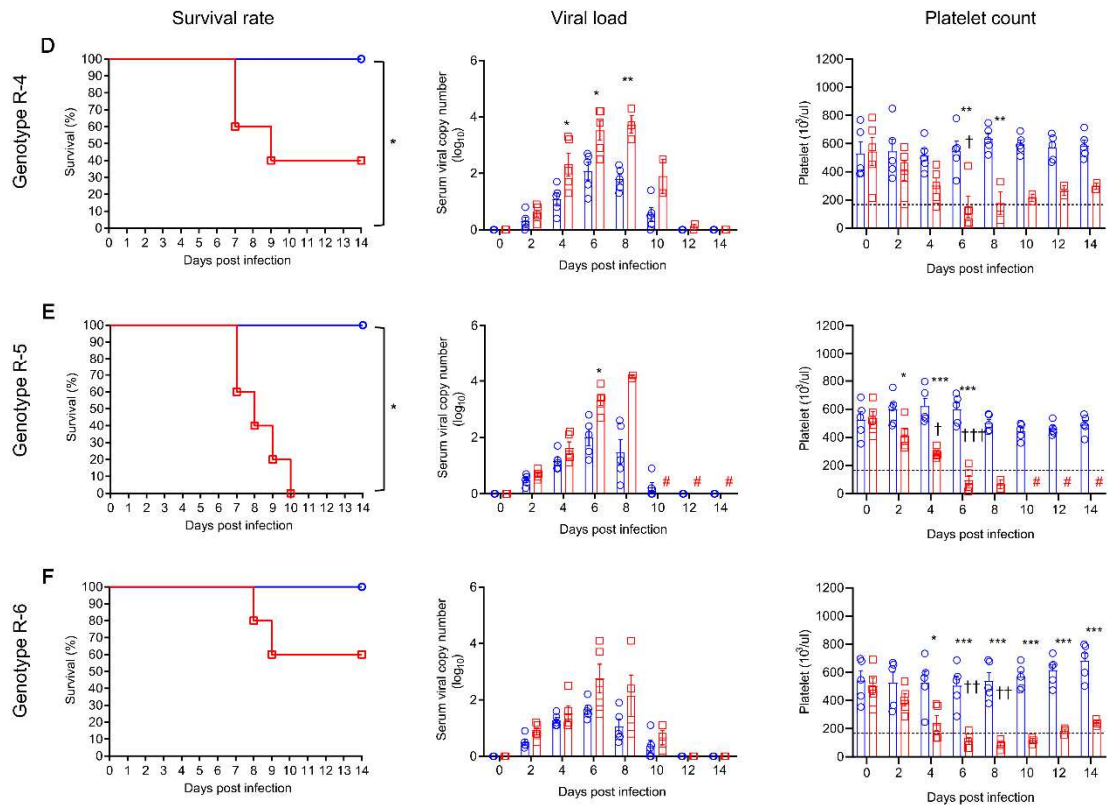



## Supplemental data

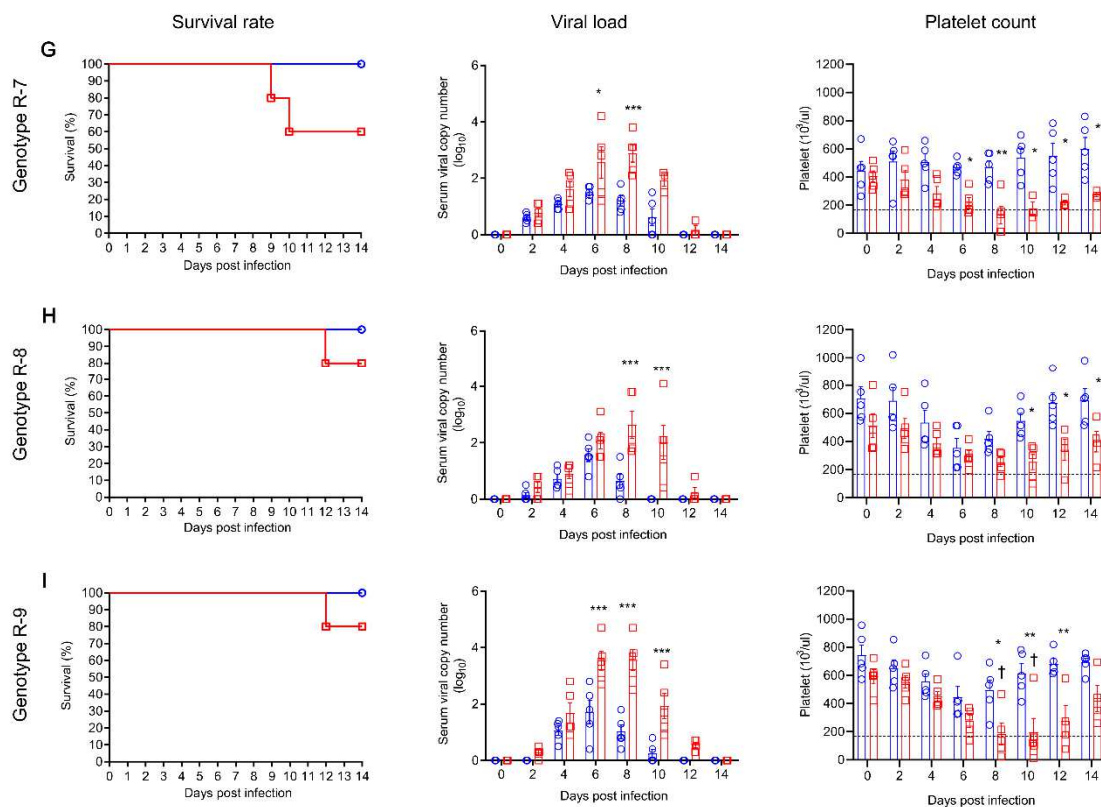

**Supplemental Figure 5.** Pathogenicity of each randomly selected SFTSV reassortant genotype in ferrets. Young adult (< 2 years, n=5) or aged female and male ferrets (> 4 years, n=5) were inoculated with  $10^{5.0}$  FFU/ml of each randomly selected SFTSV strain (A) R-1, (B) R-2, (C) R-3, (D) R-4, (E) R-5, (F) R-6, (G) R-7, (H) R-8 and (I) R-9. Survival (first lane), viral titers in serum (second lane), and platelet concentration (third lane) were assessed. The normal range of platelets ( $171.7\text{--}1,280.6 \times 10^3$  per  $\mu\text{l}$ ) is marked by dashed lines in each panel. Both viral titers and platelet concentrations are presented as mean  $\pm$  SEM. Comparison between results in young adult and aged ferrets is represented in blue and red, respectively. Asterisks (\*) indicate statistical significance between infected young adult and infected aged ferrets per day post-infection as determined by Mantel-Cox method (survival), two way ANOVA with Sidak comparison (viral copy number and platelet). The significance

## Supplemental data

(platelet) between non infected aged adult and infected aged ferrets were calculated by two way ANOVA with Tukey's test which are indicated with dagger (†). (\*, † indicate  $p < 0.05$ , and \*\*, †† indicate  $p < 0.001$ , \*\*\*indicate  $p < 0.0001$ ).



# Supplemental data

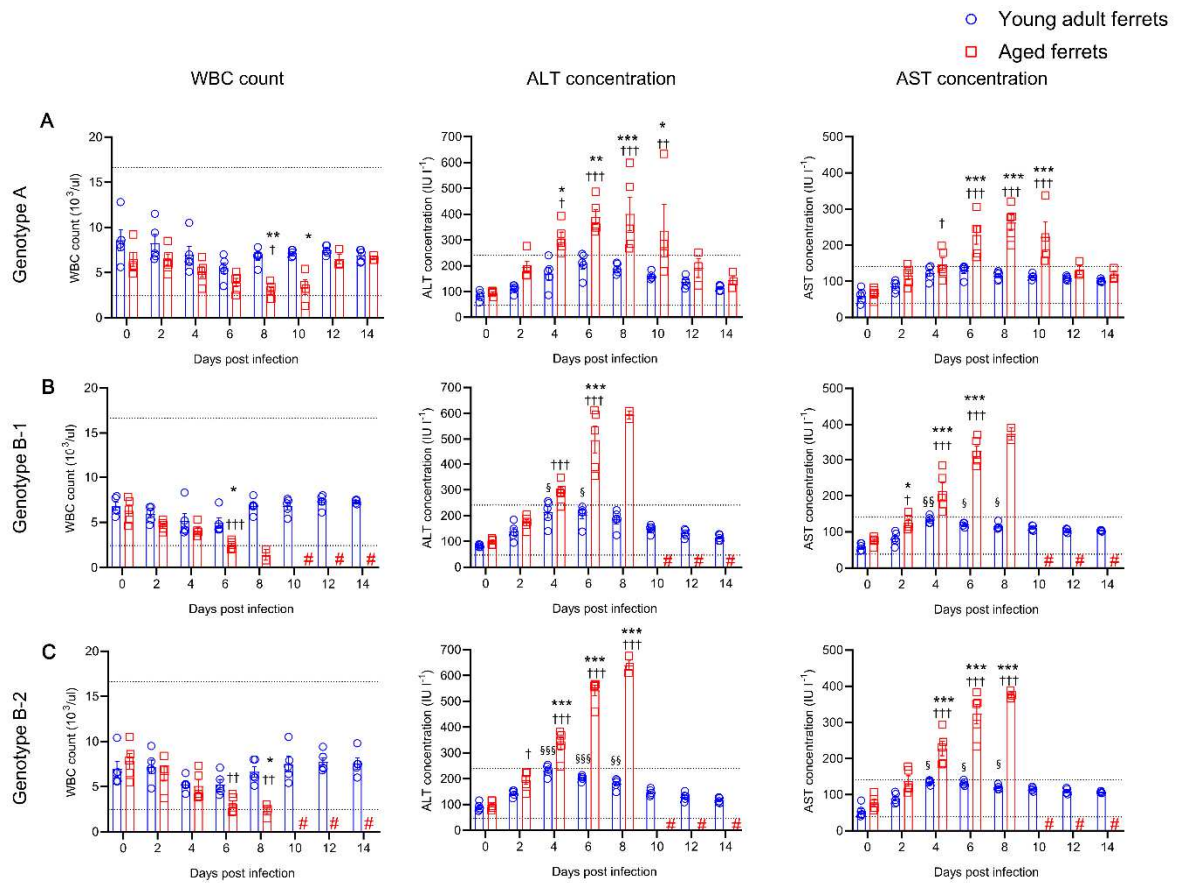

## Supplemental data

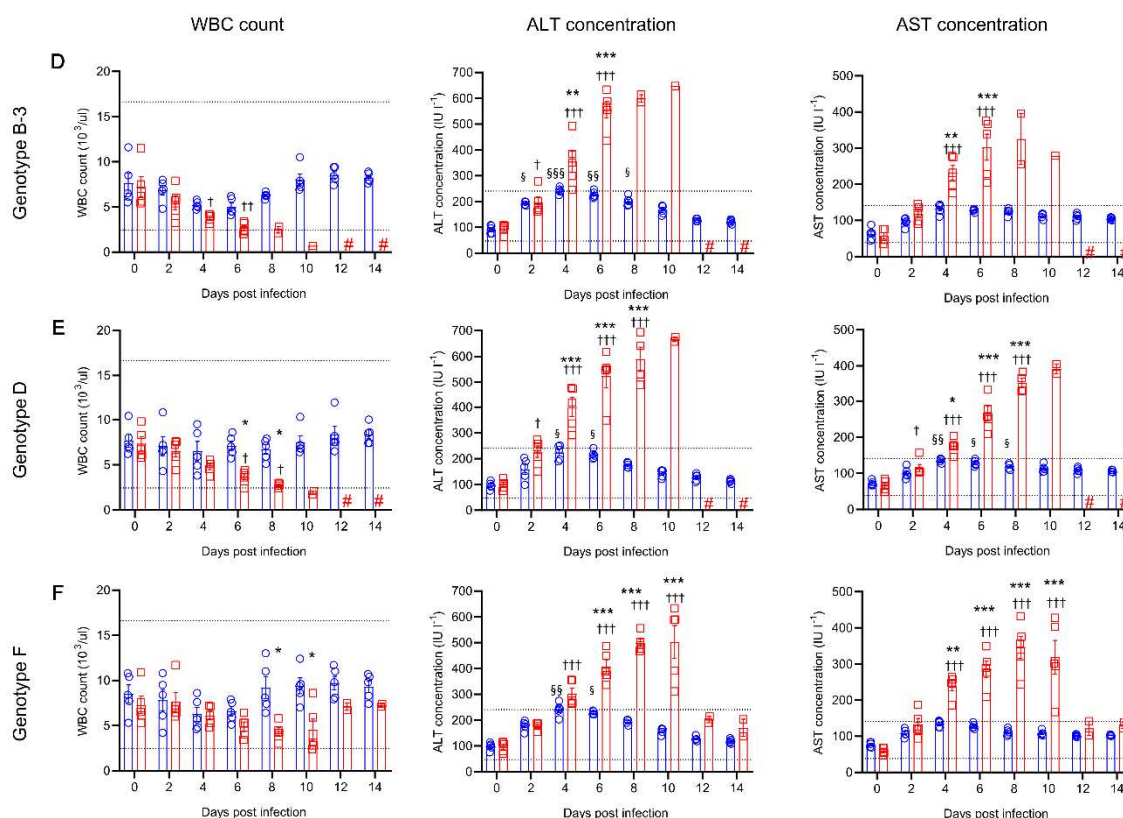

**Supplemental Figure 6.** Hematology analysis of each randomly selected SFTSV pure genotype in ferrets. . Young adult (< 2 years, n=5) or aged female and male ferrets (> 4 years, n=5) were inoculated with  $10^{5.0}$  FFU/ml of each randomly selected SFTSV strain (A) A, (B) B-1, (C) B-2, (D) B-3, (E) D, (F) F. WBC count (first lane), ALT (second lane) and AST (third lane) levels were assessed. WBC, ALT and AST concentrations are presented as mean  $\pm$  SEM. Comparison between results in young adult and aged ferrets is represented in blue and red, respectively. Asterisks indicate statistical significance between infected young adult and infected aged ferrets per day post-infection as determined by two way ANOVA with Sidak comparison tests. The significance between non infected young adult and infected young adult ferrets or between non infected aged and infected aged ferrets were calculated by two way ANOVA with Tukey's test which are indicated with section signs (§) and daggers



## Supplemental data

(†), respectively. (\*, §, † indicate  $p < 0.05$ , and \*\*, §§, †† indicate  $p < 0.001$ , \*\*\*, §§§, ††† indicate  $p < 0.0001$ ).

# Supplemental data

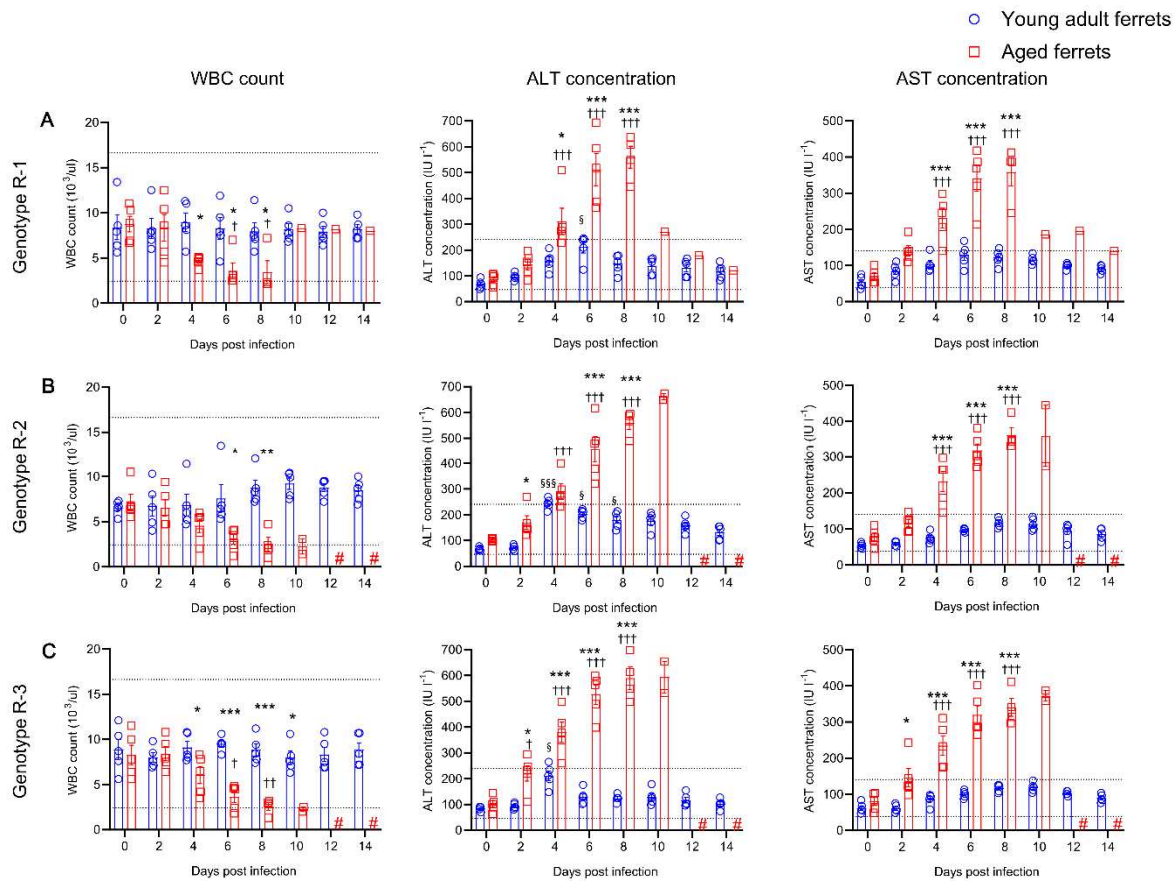



# Supplemental data

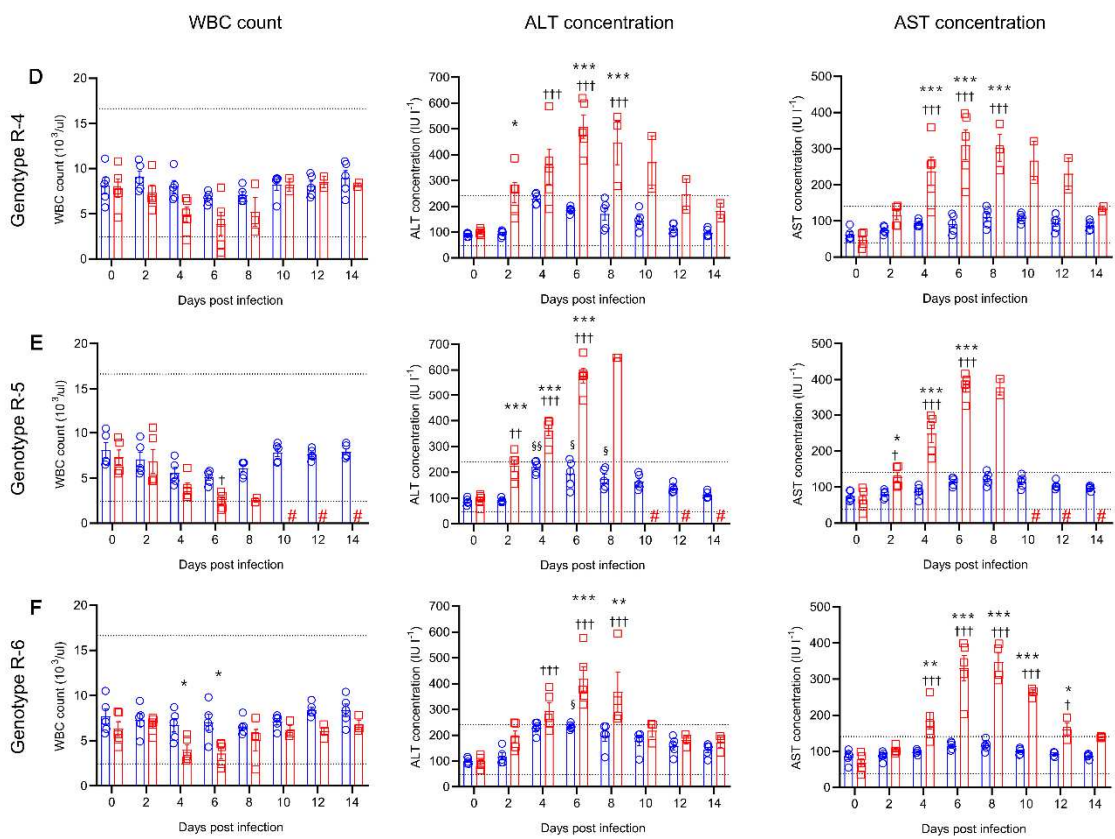

## Supplemental data

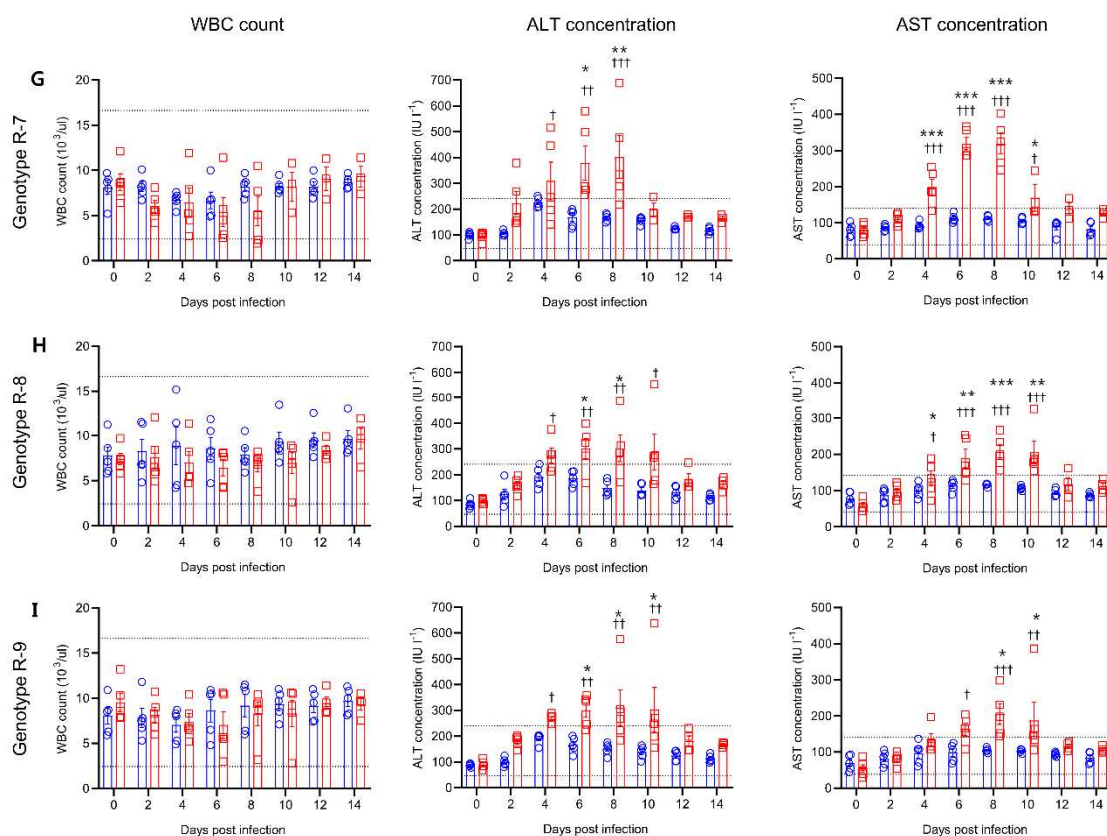

**Supplemental Figure 7.** Hematology analysis of each randomly selected SFTSV reassortant genotype in ferrets. Young adult (< 2 years, n=5) or aged female and male ferrets (> 4 years, n=5) were inoculated with  $10^{5.0}$  FFU/ml of each randomly selected SFTSV strain (A) R-1, (B) R-2, (C) R-3, (D) R-4, (E) R-5, (F) R-6, (G) R-7, (H) R-8 and (I) R-9. WBC counts (first lane), ALT (second lane) and AST (third lane) levels were assessed. WBC, ALT and AST concentrations are presented as mean  $\pm$  SEM. Comparison between results in young adult and aged ferrets is represented in blue and red, respectively Asterisks indicate statistical significance between infected young adult and infected aged ferrets per day post-infection as determined by two way ANOVA with Sidak comparison tests. The significance between non infected young adult and infected young adult ferrets or between non infected aged and infected aged ferret were calculated by two way ANOVA with Tukey's test which



## Supplemental data

are indicated with section signs (§) and daggers (†), respectively. (\*, §, † indicate  $p < 0.05$ , and \*\*, §§, †† indicate  $p < 0.001$ , \*\*\*, §§§, ††† indicate  $p < 0.0001$ ).

Supplemental data

**Supplemental Table 1.** Clinical information of 233 confirmed SFTS cases identified in this study, except for those patients with unknown symptom.

| Clinical manifestations                                                   | No. of patients (%)<br>(n=233) | Outcomes                  |                                |
|---------------------------------------------------------------------------|--------------------------------|---------------------------|--------------------------------|
|                                                                           |                                | Fatal cases (%)<br>(n=47) | Non-fatal cases (%)<br>(n=186) |
| High fever ( $\geq 38^{\circ}\text{C}$ )                                  | 198 (85.0)                     | 40 (20.2)                 | 158 (79.8)                     |
| Thrombocytopenia                                                          | 188 (80.7)                     | 39 (20.7)                 | 149 (79.3)                     |
| Leukocytopenia                                                            | 150 (64.4)                     | 27 (18.0)                 | 123 (82.0)                     |
| Gastrointestinal symptoms,<br>including vomiting,<br>diarrhea, and nausea | 76 (32.6)                      | 17 (22.4)                 | 59 (77.6)                      |
| Multiple organ failure                                                    | 17 (7.3)                       | 10 (58.8)                 | 7 (41.2)                       |
| Loss of consciousness                                                     | 2 (0.9)                        | 1 (50.0)                  | 1 (50.0)                       |
| Cerebral hemorrhage                                                       | 1 (0.4)                        | 1 (100.0)                 | 0 (0.0)                        |
| Lymph node enlargement                                                    | 1 (0.4)                        | 0 (0.0)                   | 1 (100.0)                      |
| Neurological symptoms                                                     | 1 (0.4)                        | 0 (0.0)                   | 1 (100.0)                      |
| Sepsis                                                                    | 1 (0.4)                        | 1 (100.0)                 | 0 (0.0)                        |



**Supplemental Table 2.** The genotype prevalence of SFTSVs by country.

| Strain                    | Country | L ORF      | M ORF | S ORF | Reassortant |
|---------------------------|---------|------------|-------|-------|-------------|
| <i>Gangwon/Korea/2012</i> | Korea   | F          | F     | F     |             |
| <i>KASJH</i>              | Korea   | D          | D     | D     |             |
| <i>KAGWH3</i>             | Korea   | B-2        | B-2   | B-2   |             |
| <i>KAGBH5</i>             | Korea   | B-2        | B-2   | B-2   |             |
| <i>KAGBH6</i>             | Korea   | B-2        | B-2   | B-2   |             |
| <i>KACNH3</i>             | Korea   | B-1        | B-1   | B-1   |             |
| <i>KAGWT</i>              | Korea   | B-2        | B-2   | B-2   |             |
| <i>CB1</i>                | Korea   | B-3        | B-3   | B-1   | R-3         |
| <i>CB2</i>                | Korea   | A          | A     | A     |             |
| <i>CB3</i>                | Korea   | B-1        | B-1   | B-1   |             |
| <i>CB6</i>                | Korea   | B-3        | B-3   | B-3   |             |
| <i>CB7</i>                | Korea   | B-2        | B-2   | B-2   |             |
| <i>CB8</i>                | Korea   | D          | D     | D     |             |
| <i>CB13</i>               | Korea   | A          | A     | A     |             |
| <i>KAJNH2</i>             | Korea   | B-3        | B-3   | B-3   |             |
| <i>KAGNH4</i>             | Korea   | B-2        | B-2   | B-2   |             |
| <i>KAGNH</i>              | Korea   | B-2        | B-2   | B-2   |             |
| <i>KADGH4</i>             | Korea   | Unassigned | B-2   | B-1   | R-7         |
| <i>KADGH</i>              | Korea   | B-3        | B-3   | B-3   |             |
| <i>13-1 (KAJJH)</i>       | Korea   | B-3        | B-3   | B-1   | R-3         |
| <i>13-2 (KAGBH)</i>       | Korea   | B-2        | B-2   | B-2   |             |
| <i>13-3 (KAGWH)</i>       | Korea   | B-2        | B-2   | B-2   |             |
| <i>13-4 (KACNH)</i>       | Korea   | D          | D     | D     |             |
| <i>13-5 (KAGBH2)</i>      | Korea   | B-2        | B-2   | B-2   |             |
| <i>13-7 (KAGNH2)</i>      | Korea   | B-3        | B-3   | B-1   | R-3         |
| <i>13-8 (KAGBH3)</i>      | Korea   | B-2        | B-2   | B-2   |             |
| <i>13-9 (KAJNH)</i>       | Korea   | A          | A     | A     |             |
| <i>13-11 (KAICH)</i>      | Korea   | A          | A     | A     |             |
| <i>13-12 (KAJJH2)</i>     | Korea   | B-3        | B-3   | B-3   |             |
| <i>13-13 (KACNH2)</i>     | Korea   | B-3        | F     | B-3   | R-4         |
| <i>13-15 (KAUSH)</i>      | Korea   | B-3        | B-3   | B-1   | R-3         |
| <i>13-16 (KAUSH2)</i>     | Korea   | B-2        | B-2   | B-2   |             |
| <i>13-17 (KAGWH2)</i>     | Korea   | A          | A     | A     |             |
| <i>13-18 (KADGH2)</i>     | Korea   | B-2        | B-2   | B-2   |             |

Supplemental data

|                          |       |     |     |     |     |
|--------------------------|-------|-----|-----|-----|-----|
| <b>13-19 (KAJNH3)</b>    | Korea | B-3 | B-3 | B-3 |     |
| <b>13-20 (KAGNH3)</b>    | Korea | B-3 | B-3 | B-3 |     |
| <b>13-21 (KAGBH4)</b>    | Korea | B-2 | B-2 | B-2 |     |
| <b>13-22 (KADGH3)</b>    | Korea | B-2 | B-2 | B-2 |     |
| <b>13-25 (KASUH)</b>     | Korea | B-2 | B-2 | B-2 |     |
| <b>13-26 (KADGH5)</b>    | Korea | B-2 | B-2 | B-2 |     |
| <b>14-5 (14KS22)</b>     | Korea | B-2 | B-2 | B-2 |     |
| <b>14-6 (14KS25)</b>     | Korea | B-3 | B-3 | B-1 | R-3 |
| <b>14-8 (14KS27)</b>     | Korea | B-2 | B-2 | B-2 |     |
| <b>14-9 (14KS30)</b>     | Korea | B-3 | B-3 | B-3 |     |
| <b>14-10 (14KS33)</b>    | Korea | B-1 | B-2 | B-2 | R-2 |
| <b>14-11 (14KS35)</b>    | Korea | F   | F   | F   |     |
| <b>14-12 (14KS38)</b>    | Korea | B-3 | B-3 | B-3 |     |
| <b>14-13 (14KS39)</b>    | Korea | F   | F   | F   |     |
| <b>14-14 (14KS42)</b>    | Korea | B-2 | B-2 | B-2 |     |
| <b>14-15 (14KS44)</b>    | Korea | B-1 | B-2 | B-2 | R-2 |
| <b>14-16 (14KS46)</b>    | Korea | B-2 | B-2 | B-2 |     |
| <b>14-17 (14KS47)</b>    | Korea | F   | F   | F   |     |
| <b>14-18 (14KS48,49)</b> | Korea | B-2 | B-2 | B-2 |     |
| <b>14-19 (14KS52)</b>    | Korea | A   | A   | A   |     |
| <b>14-20 (14KS53,55)</b> | Korea | B-1 | B-1 | B-1 |     |
| <b>14-21 (14KS58)</b>    | Korea | D   | D   | D   |     |
| <b>14-22 (14KS62)</b>    | Korea | B-2 | B-2 | B-2 |     |
| <b>14-23 (14KS64)</b>    | Korea | D   | D   | D   |     |
| <b>14-24 (14KS72)</b>    | Korea | B-2 | B-2 | B-2 |     |
| <b>14-25 (14KS73)</b>    | Korea | B-2 | B-2 | B-2 |     |
| <b>15-1 (15KS5)</b>      | Korea | B-3 | B-3 | B-3 |     |
| <b>15-3 (15KS8)</b>      | Korea | F   | F   | F   |     |
| <b>15-4 (15KS9)</b>      | Korea | B-2 | B-2 | B-2 |     |
| <b>15-6 (15KS10)</b>     | Korea | B-2 | B-2 | B-2 |     |
| <b>15-8 (15MS31)</b>     | Korea | F   | F   | F   |     |
| <b>15-10 (15MS32)</b>    | Korea | B-1 | B-1 | B-1 |     |
| <b>15-11 (15KS15)</b>    | Korea | B-3 | B-3 | B-3 |     |
| <b>15-12 (15KS16)</b>    | Korea | B-2 | B-2 | B-2 |     |
| <b>15-15 (15KS19)</b>    | Korea | B-2 | B-2 | B-2 |     |
| <b>15-16 (15KS20)</b>    | Korea | B-2 | B-2 | B-2 |     |
| <b>15-17 (15KS23)</b>    | Korea | B-2 | B-2 | B-2 |     |

Supplemental data

|                              |       |            |     |     |     |
|------------------------------|-------|------------|-----|-----|-----|
| <b>15-18 (15KS25)</b>        | Korea | B-2        | B-2 | B-2 |     |
| <b>15-19 (15KS26)</b>        | Korea | B-2        | B-2 | B-2 |     |
| <b>15-20 (15MS65)</b>        | Korea | B-3        | B-3 | B-3 |     |
| <b>15-21 (15KS28)</b>        | Korea | B-2        | B-2 | B-2 |     |
| <b>15-22 (15KS29)</b>        | Korea | B-3        | B-3 | B-3 |     |
| <b>15-23 (15KS31)</b>        | Korea | B-2        | B-2 | B-2 |     |
| <b>15-24 (15KS33)</b>        | Korea | B-3        | B-3 | B-3 |     |
| <b>15-25 (15KS43)</b>        | Korea | B-2        | B-2 | B-2 |     |
| <b>15-26 (15KS47)</b>        | Korea | B-3        | B-3 | B-3 |     |
| <b>15-28 (15KS50)</b>        | Korea | B-3        | B-3 | B-3 |     |
| <b>15-29 (15MS104)</b>       | Korea | B-3        | B-3 | B-3 |     |
| <b>15-30 (15KS51)</b>        | Korea | B-3        | B-3 | B-3 |     |
| <b>15-32 (15Asan_Serum1)</b> | Korea | B-3        | B-3 | B-3 |     |
| <b>15-33 (15KS57)</b>        | Korea | A          | A   | A   |     |
| <b>15-34 (15KS59)</b>        | Korea | B-3        | B-3 | B-3 |     |
| <b>15-35 (15KS61)</b>        | Korea | B-3        | B-3 | B-3 |     |
| <b>15-36 (15KS62)</b>        | Korea | B-3        | B-3 | B-3 |     |
| <b>15-37 (15KS64)</b>        | Korea | A          | A   | A   |     |
| <b>15-38 (15KS67)</b>        | Korea | B-1        | B-2 | B-2 | R-2 |
| <b>15-39 (15KS71)</b>        | Korea | B-2        | B-2 | B-2 |     |
| <b>15-40 (15KS72)</b>        | Korea | B-2        | B-2 | B-2 |     |
| <b>15-41 (15KS73)</b>        | Korea | F          | F   | F   |     |
| <b>15-42 (15MS132)</b>       | Korea | B-2        | B-2 | B-2 |     |
| <b>15-43 (15KS74)</b>        | Korea | B-2        | B-2 | B-2 |     |
| <b>15-44 (15KS75)</b>        | Korea | B-1        | B-1 | B-1 |     |
| <b>15-45 (15KS77)</b>        | Korea | B-3        | B-3 | B-3 |     |
| <b>16-26 (16KS54)</b>        | Korea | B-3        | B-3 | B-1 | R-3 |
| <b>16-27 (16KS55)</b>        | Korea | D          | B-1 | D   | R-6 |
| <b>16-28 (16MS239)</b>       | Korea | B-1        | B-1 | B-1 |     |
| <b>16-29 (16KS62)</b>        | Korea | B-3        | B-3 | B-3 |     |
| <b>16-30 (16KS63)</b>        | Korea | B-3        | B-3 | B-3 |     |
| <b>16-31 (16MS269)</b>       | Korea | B-2        | B-2 | B-2 |     |
| <b>16-32 (16KS71)</b>        | Korea | B-1        | B-1 | B-1 |     |
| <b>16-33 (16MS286)</b>       | Korea | B-1        | B-1 | B-1 |     |
| <b>16-34 (16KS77)</b>        | Korea | Unassigned | B-3 | B-1 | R-8 |
| <b>16-35 (16KS80)</b>        | Korea | B-1        | B-1 | B-1 |     |
| <b>16-36 (16KS83)</b>        | Korea | B-3        | B-3 | B-3 |     |



Supplemental data

|                        |       |            |            |     |     |
|------------------------|-------|------------|------------|-----|-----|
| <b>16-37 (16KS85)</b>  | Korea | B-2        | B-2        | B-2 |     |
| <b>16-38 (16KS86)</b>  | Korea | B-2        | B-2        | B-2 |     |
| <b>16-39 (16KS89)</b>  | Korea | F          | F          | F   |     |
| <b>16-40 (16KS92)</b>  | Korea | B-2        | B-2        | B-2 |     |
| <b>16-41 (16MS299)</b> | Korea | B-1        | B-2        | B-1 | R-1 |
| <b>16-42 (16MS300)</b> | Korea | F          | F          | F   |     |
| <b>16-43 (16MS310)</b> | Korea | B-1        | B-2        | B-2 | R-2 |
| <b>16-44 (16MS313)</b> | Korea | B-3        | B-3        | B-3 |     |
| <b>16-45 (16MS315)</b> | Korea | B-1        | B-1        | B-1 |     |
| <b>16-46 (16MS322)</b> | Korea | C          | D          | C   | R-5 |
| <b>16-47 (16KS96)</b>  | Korea | A          | A          | A   |     |
| <b>16-48 (16KS100)</b> | Korea | B-1        | B-1        | B-1 |     |
| <b>16-49 (16MS323)</b> | Korea | B-2        | B-2        | B-2 |     |
| <b>16-50 (16MS344)</b> | Korea | B-1        | B-1        | B-1 |     |
| <b>16-51 (16MS347)</b> | Korea | B-2        | B-2        | B-2 |     |
| <b>16-52 (16MS351)</b> | Korea | B-2        | B-2        | B-2 |     |
| <b>16-53 (16MS368)</b> | Korea | B-3        | B-3        | B-3 |     |
| <b>16-54 (16MS373)</b> | Korea | Unassigned | Unassigned | B-1 | R-9 |
| <b>16-55 (16KS104)</b> | Korea | B-1        | B-1        | B-1 |     |
| <b>16-56 (16KS108)</b> | Korea | B-2        | B-2        | B-2 |     |
| <b>16-57 (16KS112)</b> | Korea | B-1        | B-1        | B-1 |     |
| <b>16-58 (16KS115)</b> | Korea | A          | A          | A   |     |
| <b>16-59 (16KS116)</b> | Korea | B-1        | B-1        | B-1 |     |
| <b>16-60 (16KS126)</b> | Korea | B-1        | B-1        | B-1 |     |
| <b>16-61 (16KS128)</b> | Korea | B-2        | B-2        | B-2 |     |
| <b>16-62 (16KS129)</b> | Korea | B-3        | B-3        | B-3 |     |
| <b>YG1</b>             | Japan | B-2        | B-2        | B-2 |     |
| <b>SPL003A</b>         | Japan | B-2        | B-2        | B-2 |     |
| <b>SPL004A</b>         | Japan | B-3        | B-3        | B-3 |     |
| <b>SPL005A</b>         | Japan | B-2        | B-2        | B-2 |     |
| <b>SPL010A</b>         | Japan | B-2        | B-2        | B-2 |     |
| <b>SPL030A</b>         | Japan | B-2        | B-2        | B-2 |     |
| <b>SPL032A</b>         | Japan | B-2        | B-2        | B-2 |     |
| <b>SPL035A</b>         | Japan | B-2        | B-2        | B-2 |     |
| <b>SPL053A</b>         | Japan | B-2        | B-2        | B-2 |     |
| <b>SPL054A</b>         | Japan | B-2        | B-2        | B-2 |     |
| <b>SPL055A</b>         | Japan | B-2        | B-2        | B-2 |     |

Supplemental data

|                         |       |            |     |     |     |
|-------------------------|-------|------------|-----|-----|-----|
| <b>SPL057A</b>          | Japan | Unassigned | B-1 | B-1 | Yes |
| <b>SPL060A</b>          | Japan | B-2        | B-2 | B-2 |     |
| <b>SPL062A</b>          | Japan | B-2        | B-2 | B-2 |     |
| <b>SPL066A</b>          | Japan | B-2        | B-2 | B-2 |     |
| <b>SPL067A</b>          | Japan | B-2        | B-2 | B-2 |     |
| <b>SPL069A</b>          | Japan | B-2        | B-2 | B-2 |     |
| <b>SPL070A</b>          | Japan | B-2        | B-2 | B-2 |     |
| <b>SPL071A</b>          | Japan | B-2        | B-2 | B-2 |     |
| <b>SPL075A</b>          | Japan | B-2        | B-2 | B-2 |     |
| <b>SPL077A</b>          | Japan | B-2        | B-2 | B-2 |     |
| <b>SPL078A</b>          | Japan | B-2        | B-2 | B-2 |     |
| <b>SPL082A</b>          | Japan | B-2        | B-2 | B-2 |     |
| <b>SPL084A</b>          | Japan | B-2        | B-2 | B-2 |     |
| <b>SPL086A</b>          | Japan | B-2        | B-2 | B-2 |     |
| <b>SPL087A</b>          | Japan | C          | D   | C   | Yes |
| <b>SPL089A</b>          | Japan | B-2        | B-2 | B-2 |     |
| <b>SPL090A</b>          | Japan | B-2        | B-2 | B-2 |     |
| <b>SPL097A</b>          | Japan | Unassigned | B-1 | B-1 | Yes |
| <b>SPL100A</b>          | Japan | Unassigned | B-1 | B-1 | Yes |
| <b>SPL104A</b>          | Japan | B-2        | B-2 | B-2 |     |
| <b>SPL105A</b>          | Japan | B-2        | B-2 | B-2 |     |
| <b>SPL106A</b>          | Japan | B-2        | B-2 | B-2 |     |
| <b>SPL107A</b>          | Japan | B-2        | B-2 | B-2 |     |
| <b>SPL108A</b>          | Japan | B-2        | B-2 | B-2 |     |
| <b>SPL112A</b>          | Japan | B-2        | B-2 | B-2 |     |
| <b>SPL114A</b>          | Japan | B-2        | B-2 | B-2 |     |
| <b>SPL117A</b>          | Japan | B-2        | B-2 | B-2 |     |
| <b>SPL120A</b>          | Japan | B-2        | B-2 | B-2 |     |
| <b>SPL121A</b>          | Japan | B-2        | B-2 | B-2 |     |
| <b>SPL124A</b>          | Japan | B-2        | B-2 | B-2 |     |
| <b>SPL128A</b>          | Japan | B-2        | B-2 | B-2 |     |
| <b>SPL129A</b>          | Japan | B-3        | B-3 | B-3 |     |
| <b>SDLZtick12/2010</b>  | China | F          | F   | F   |     |
| <b>HB154/China/2011</b> | China | D          | D   | D   |     |
| <b>HB155/China/2011</b> | China | D          | D   | D   |     |
| <b>HB156/China/2011</b> | China | D          | D   | D   |     |
| <b>HNXY_207</b>         | China | F          | F   | F   |     |

Supplemental data

|                             |       |   |   |   |     |
|-----------------------------|-------|---|---|---|-----|
| <b><i>HNXY_170</i></b>      | China | F | F | F |     |
| <b><i>HNXY_130</i></b>      | China | F | F | F |     |
| <b><i>HNXY_224</i></b>      | China | F | F | F |     |
| <b><i>HNXY_2</i></b>        | China | F | F | F |     |
| <b><i>HNXY_319</i></b>      | China | F | F | F |     |
| <b><i>HNXY_245</i></b>      | China | F | F | F |     |
| <b><i>HNXY_327</i></b>      | China | D | D | D |     |
| <b><i>HNXY_278</i></b>      | China | A | A | A |     |
| <b><i>HNXY_191</i></b>      | China | A | A | A |     |
| <b><i>HNXY_182</i></b>      | China | F | F | F |     |
| <b><i>HNXY_202</i></b>      | China | F | F | F |     |
| <b><i>HNXY_195</i></b>      | China | F | F | F |     |
| <b><i>HNXY_188</i></b>      | China | A | A | A |     |
| <b><i>HNXY_206</i></b>      | China | A | A | A |     |
| <b><i>HNXY_212</i></b>      | China | D | D | D |     |
| <b><i>HNXY_293</i></b>      | China | F | F | F |     |
| <b><i>HNXY_157</i></b>      | China | F | F | F |     |
| <b><i>HNXY_174</i></b>      | China | F | F | F |     |
| <b><i>HNXY_144</i></b>      | China | F | F | F |     |
| <b><i>HNXY_186</i></b>      | China | F | F | F |     |
| <b><i>HNXY_262</i></b>      | China | F | F | F |     |
| <b><i>HNXY_31</i></b>       | China | F | F | F |     |
| <b><i>HNXY_93</i></b>       | China | F | F | F |     |
| <b><i>HNXY_115</i></b>      | China | F | F | F |     |
| <b><i>HNXY_231</i></b>      | China | F | F | F |     |
| <b><i>HNXY_164</i></b>      | China | F | F | F |     |
| <b><i>JS2012-tick01</i></b> | China | F | F | F |     |
| <b><i>JS2012-goat01</i></b> | China | F | F | F |     |
| <b><i>JS2007-01</i></b>     | China | A | F | A | Yes |
| <b><i>JS2010-014</i></b>    | China | F | F | F |     |
| <b><i>JS2010-015</i></b>    | China | F | F | F |     |
| <b><i>JS2010-018</i></b>    | China | F | F | F |     |
| <b><i>JS2010-019</i></b>    | China | F | F | F |     |
| <b><i>JS2011-004</i></b>    | China | A | A | A |     |
| <b><i>JS2011-013-1</i></b>  | China | F | F | F |     |
| <b><i>JS2011-027</i></b>    | China | A | A | A |     |
| <b><i>JS2011-034</i></b>    | China | F | F | F |     |



## Supplemental data

|                         |       |            |     |     |     |
|-------------------------|-------|------------|-----|-----|-----|
| <b>JS2011-062</b>       | China | D          | D   | D   |     |
| <b>JS2011-109</b>       | China | A          | A   | A   |     |
| <b>JS2012-020</b>       | China | A          | A   | A   |     |
| <b>JS2012-035</b>       | China | A          | A   | A   |     |
| <b>Zhao</b>             | China | B-3        | B-3 | B-3 |     |
| <b>HL/Injected</b>      | China | A          | A   | A   |     |
| <b>HL/Egg/G2</b>        | China | A          | A   | A   |     |
| <b>HL/Larvae/G2</b>     | China | A          | A   | A   |     |
| <b>HL/Nymph/G2</b>      | China | A          | A   | A   |     |
| <b>HL/Adult/G2</b>      | China | A          | A   | A   |     |
| <b>LN2012-14</b>        | China | D          | F   | D   | Yes |
| <b>LN2012-34</b>        | China | D          | F   | D   | Yes |
| <b>LN2012-41</b>        | China | D          | F   | D   | Yes |
| <b>LN2012-42</b>        | China | D          | F   | D   | Yes |
| <b>LN2012-58</b>        | China | D          | F   | F   | Yes |
| <b>Zhejiang/01/2011</b> | China | B-3        | B-3 | B-3 |     |
| <b>ZJ2013-06</b>        | China | Unassigned | B-1 | B-1 | Yes |
| <b>AH15</b>             | China | A          | A   | A   |     |
| <b>HN13</b>             | China | A          | A   | A   |     |
| <b>YXX2</b>             | China | A          | A   | A   |     |
| <b>2012YXX1</b>         | China | A          | A   | A   |     |
| <b>2010-FQM</b>         | China | A          | A   | A   |     |
| <b>JS3</b>              | China | A          | A   | A   |     |
| <b>JS4</b>              | China | E          | E   | E   |     |
| <b>JS6</b>              | China | A          | A   | A   |     |
| <b>JS24</b>             | China | A          | A   | A   |     |
| <b>JS26</b>             | China | A          | A   | A   |     |
| <b>LN2/China/2010</b>   | China | F          | F   | F   |     |
| <b>LN3/China/2010</b>   | China | A          | A   | A   |     |
| <b>2011YSC60</b>        | China | A          | F   | A   | Yes |
| <b>AHL/China/2011</b>   | China | C          | C   | D   | Yes |
| <b>YSHX002</b>          | China | D          | D   | D   |     |
| <b>YGS1</b>             | China | D          | D   | D   |     |
| <b>YSC19</b>            | China | D          | D   | D   |     |
| <b>2011YGS5</b>         | China | D          | D   | D   |     |
| <b>2011YSC22</b>        | China | D          | D   | D   |     |
| <b>2011YGS7</b>         | China | D          | D   | D   |     |

## Supplemental data

|                            |       |   |   |   |  |
|----------------------------|-------|---|---|---|--|
| <b>2011YPQ17</b>           | China | D | D | D |  |
| <b>2011YPQ11</b>           | China | D | D | D |  |
| <b>2012YSH91</b>           | China | D | D | D |  |
| <b>2011YXX9</b>            | China | D | D | D |  |
| <b>2012YSH9</b>            | China | D | D | D |  |
| <b>2012YSH6</b>            | China | D | D | D |  |
| <b>2010-WSQ</b>            | China | D | D | D |  |
| <b>SD24</b>                | China | D | D | D |  |
| <b>SD4</b>                 | China | E | E | E |  |
| <b>AH12</b>                | China | F | F | F |  |
| <b>AHZ/China/2011</b>      | China | F | F | F |  |
| <b>BX-2010/Henan/CHN</b>   | China | F | F | F |  |
| <b>HN6</b>                 | China | F | F | F |  |
| <b>HN-LR/China/05/2012</b> | China | F | F | F |  |
| <b>YNY1</b>                | China | F | F | F |  |
| <b>YPQX03</b>              | China | F | F | F |  |
| <b>YPQ2</b>                | China | F | F | F |  |
| <b>YPQ5</b>                | China | F | F | F |  |
| <b>YXX1</b>                | China | F | F | F |  |
| <b>YSH39</b>               | China | F | F | F |  |
| <b>YPQ133</b>              | China | F | F | F |  |
| <b>2012YGS4</b>            | China | F | F | F |  |
| <b>2012YSH37</b>           | China | F | F | F |  |
| <b>2012YGS10</b>           | China | F | F | F |  |
| <b>2012YSH86</b>           | China | F | F | F |  |
| <b>2012YSH10</b>           | China | F | F | F |  |
| <b>2012YSC6</b>            | China | F | F | F |  |
| <b>2012YSH89</b>           | China | F | F | F |  |
| <b>2012YSH16</b>           | China | F | F | F |  |
| <b>2012YSH14</b>           | China | F | F | F |  |
| <b>2012YSH104</b>          | China | F | F | F |  |
| <b>2012YSH93</b>           | China | F | F | F |  |
| <b>2012YSH105</b>          | China | F | F | F |  |
| <b>2012YSH107</b>          | China | F | F | F |  |
| <b>2012YSH92</b>           | China | F | F | F |  |
| <b>2012YSH27</b>           | China | F | F | F |  |
| <b>JSD1</b>                | China | F | F | F |  |

## Supplemental data

|                                  |       |     |     |     |     |
|----------------------------------|-------|-----|-----|-----|-----|
| <b>2011YPQ12</b>                 | China | F   | A   | F   | Yes |
| <b>YSC3</b>                      | China | F   | F   | A   | Yes |
| <b>QD7</b>                       | China | F   | F   | F   |     |
| <b>HNXH</b>                      | China | A   | A   | A   |     |
| <b>HB29</b>                      | China | D   | D   | D   |     |
| <b>ZJZSHH-AM/China/05/2012</b>   | China | B-3 | B-3 | B-3 |     |
| <b>ZJZSHH-HYC/China/05/2012</b>  | China | B-3 | B-3 | B-3 |     |
| <b>ZJZSHH-SHZ/China/05/2012</b>  | China | B-3 | B-3 | B-3 |     |
| <b>AH-YTY/China/05/2012</b>      | China | F   | F   | F   |     |
| <b>ZJZSHH-LU/China/10/2011</b>   | China | B-3 | B-3 | B-3 |     |
| <b>ZJZSHH-ZLD/China/06/2012</b>  | China | B-3 | B-3 | B-3 |     |
| <b>ZJZSHH-HYJ/China/07/2012</b>  | China | B-3 | B-3 | B-3 |     |
| <b>ZJZSHH-XAM/China/06/2012</b>  | China | B-3 | B-3 | B-3 |     |
| <b>ZJZSHH-WSH/China/08/2012</b>  | China | A   | A   | A   |     |
| <b>ZJZSHH-HCY/China/06/2012</b>  | China | B-3 | B-3 | B-3 |     |
| <b>ZJZSHH-ZLN/China/06/2012</b>  | China | B-3 | B-3 | B-3 |     |
| <b>ZJZSHH-LHZH/China/06/2012</b> | China | B-3 | B-3 | B-3 |     |
| <b>ZJZSHH-CXD/China/05/2012</b>  | China | A   | A   | A   |     |
| <b>ZJZSHH-FDE/China/06/2012</b>  | China | B-3 | B-3 | B-3 |     |
| <b>ZJZSHH-YJX/China/06/2012</b>  | China | B-1 | B-1 | B-1 |     |
| <b>ZJZSHH-FZHR/China/07/2013</b> | China | A   | A   | A   |     |
| <b>ZJZSHH-LWL/China/08/2014</b>  | China | B-3 | B-3 | B-3 |     |
| <b>ZJZSHH-WRF/China/08/2014</b>  | China | B-3 | B-3 | B-3 |     |
| <b>JS2014-Hedgehog-02</b>        | China | F   | F   | F   |     |
| <b>JS2014-Hedgehog-01</b>        | China | A   | A   | A   |     |
| <b>JS2014-H.longicornis-03</b>   | China | F   | F   | F   |     |
| <b>JS2014-H.longicornis-02</b>   | China | F   | F   | F   |     |
| <b>JS2014-H.longicornis-01</b>   | China | B-3 | B-3 | B-1 | Yes |
| <b>JS2014-39</b>                 | China | F   | F   | A   | Yes |



Supplemental data

|                           |       |     |     |     |     |
|---------------------------|-------|-----|-----|-----|-----|
| <b><i>JS2014-33</i></b>   | China | F   | F   | F   |     |
| <b><i>JS2014-31</i></b>   | China | F   | F   | F   |     |
| <b><i>JS2014-18</i></b>   | China | A   | A   | A   |     |
| <b><i>JS2014-16</i></b>   | China | B-3 | B-3 | B-1 | Yes |
| <b><i>JS2014-15</i></b>   | China | A   | A   | A   |     |
| <b><i>JS2014-03</i></b>   | China | F   | F   | F   |     |
| <b><i>JS2013-71</i></b>   | China | A   | A   | A   |     |
| <b><i>JS2013-52</i></b>   | China | F   | F   | F   |     |
| <b><i>JS2013-46</i></b>   | China | A   | A   | A   |     |
| <b><i>JS2013-44</i></b>   | China | F   | F   | F   |     |
| <b><i>JS2012-79</i></b>   | China | F   | F   | F   |     |
| <b><i>JS2011-69</i></b>   | China | B-3 | B-3 | B-1 | Yes |
| <b><i>JS2011-13-2</i></b> | China | A   | A   | A   |     |

Supplemental data

**Supplemental Table 3.** Viral growth curve in Vero E6 cells

| Genotype | Viral growth (Log <sub>10</sub> FFU/ml) |          |          |                 |                 |          |
|----------|-----------------------------------------|----------|----------|-----------------|-----------------|----------|
|          | 1dpi                                    | 2dpi     | 3dpi     | 4dpi            | 5dpi            | 6dpi     |
| A        | 2.3±0                                   | 2.9±0.58 | 3.9±0.58 | 4.6±0.58        | <b>5.9±0.58</b> | 4.6±0.58 |
| B-1      | 2.3±0                                   | 3.6±0.58 | 5.6±0.58 | 6.9±0.58        | <b>7.6±0.58</b> | 6.9±0.58 |
| B-2      | 2.3±0                                   | 3.6±0.58 | 4.9±0.58 | 6.6±0.58        | <b>7.3±0</b>    | 6.6±0.58 |
| B-3      | 2.3±0                                   | 2.9±0.58 | 4.9±0.58 | 5.6±0.58        | <b>6.3±0</b>    | 5.9±0.58 |
| D        | 2.3±0                                   | 2.9±0.58 | 5.3±0    | 5.3±0           | <b>5.9±0.58</b> | 5.3±0    |
| F        | 2.3±0                                   | 3.6±0.58 | 4.9±0.58 | <b>5.6±0.58</b> | 5.6±0.58        | 4.9±0.58 |
| R1       | 2.3±0                                   | 2.9±0.58 | 4.9±0.58 | 5.9±0.58        | <b>6.3±0</b>    | 5.6±0.58 |
| R2       | 2.3±0                                   | 2.9±0.58 | 4.9±0.58 | 4.9±0.58        | <b>6.3±0</b>    | 5.3±0    |
| R3       | 2.3±0                                   | 2.9±0.58 | 5.3±0    | 5.9±0.58        | <b>6.6±0.58</b> | 5.6±0.58 |
| R4       | 2.3±0                                   | 2.9±0.58 | 3.9±0.58 | 5.6±0.58        | <b>6.3±0</b>    | 5.3±0    |
| R5       | 2.3±0                                   | 2.9±0.58 | 4.6±0.58 | <b>5.3±0</b>    | 5.3±0           | 5.3±1    |
| R6       | 2.3±0                                   | 3.9±0.58 | 4.9±0.58 | 5.9±0.58        | <b>6.3±0</b>    | 5.9±0.58 |
| R7       | 2.3±0                                   | 2.9±0.58 | 4.9±0.58 | 5.3±0           | <b>5.9±0.58</b> | 5.3±0    |
| R8       | 2.3±0                                   | 2.9±0.58 | 3.9±0    | 3.9±0.58        | <b>5.3±0</b>    | 4.9±0.58 |
| R9       | 2.3±0                                   | 2.9±0.58 | 3.3±0    | 4.6±0.58        | <b>5.3±0</b>    | 4.3±0    |

<sup>a</sup>Results were obtained from three independent assays and expressed as log<sub>10</sub> FFU/ml.

<sup>b</sup>± indicates Standard deviation .

Bold indicates peak titer in each strain

## Supplemental data

**Supplemental Table 4.** Sequence information of SFTSV strains used in this study.

| SFTSV strain              | Genotype          | Source of virus                  | Geographical origin | Year of isolation | GenBank accession No. |           |           | Sequence source |
|---------------------------|-------------------|----------------------------------|---------------------|-------------------|-----------------------|-----------|-----------|-----------------|
|                           |                   |                                  |                     |                   | L segment             | M segment | S segment |                 |
| <b>Gangwon/Korea/2012</b> | F                 | Human serum                      | Korea               | 2012.8            | KF358691              | KF358692  | KF358693  | GenBank         |
| <b>KASJH</b>              | D                 | Human serum                      | Korea               | 2014.9            | KP663731              | KP663732  | KP663733  | GenBank         |
| <b>KAGWH3</b>             | B-2               | Human serum                      | Korea               | 2014.9            | KP663734              | KP663735  | KP663736  | GenBank         |
| <b>KAGBH5</b>             | B-2               | Human serum                      | Korea               | 2014.9            | KP663737              | KP663738  | KP663739  | GenBank         |
| <b>KAGBH6</b>             | B-2               | Human serum                      | Korea               | 2014.9            | KP663740              | KP663741  | KP663742  | GenBank         |
| <b>KACNH3</b>             | B-1               | Human serum                      | Korea               | 2014.9            | KP663743              | KP663744  | KP663745  | GenBank         |
| <b>KAGWT</b>              | B-2               | <i>Haemaphysalis longicornis</i> | Korea               | 2013.6            | KY273136              | KY273137  | KY273138  | GenBank         |
| <b>CB1</b>                | Reassortant (R-3) | Human serum                      | Korea               | 2014.8            | KY789433              | KY789436  | KY789439  | GenBank         |
| <b>CB2</b>                | A                 | Human serum                      | Korea               | 2015.7            | KY789434              | KY789437  | KY789440  | GenBank         |
| <b>CB3</b>                | B-1               | Human serum                      | Korea               | 2016.10           | KY789435              | KY789438  | KY789441  | GenBank         |
| <b>CB6</b>                | B-3               | Human serum                      | Korea               | 2016.8            | MK301480              | MK301481  | MK301482  | GenBank         |
| <b>CB7</b>                | B-2               | Human serum                      | Korea               | 2017.5            | MK301483              | MK301484  | MK301485  | GenBank         |
| <b>CB8</b>                | D                 | Human serum                      | Korea               | 2016.5            | MK301486              | MK301487  | MK301488  | GenBank         |
| <b>CB13</b>               | A                 | Human serum                      | Korea               | 2016.11           | MK301489              | MK301490  | MK301491  | GenBank         |
| <b>KAJNH2</b>             | B-3               | Human serum                      | Korea               | 2013.7            | KU507547              | KU507552  | KU507557  | GenBank         |
| <b>KAGNH4</b>             | B-2               | Human serum                      | Korea               | 2013.10           | KU507546              | KU507551  | KU507556  | GenBank         |
| <b>KAGNH</b>              | B-2               | Human serum                      | Korea               | 2013.7            | KU507545              | KU507550  | KU507555  | GenBank         |
| <b>KADGH4</b>             | Reassortant (R-7) | Human serum                      | Korea               | 2013.10           | KU507544              | KU507549  | KU507554  | GenBank         |
| <b>KADGH</b>              | B-3               | Human serum                      | Korea               | 2013.8            | KU507543              | KU507548  | KU507553  | GenBank         |
| <b>13-1 (KAJJH)</b>       | B-3               | Human serum                      | Korea               | 2013.5            | MG736973              | MG737082  | MG737191  | In this study   |
| <b>13-2 (KAGBH)</b>       | B-2               | Human serum                      | Korea               | 2013.5            | MG736974              | MG737083  | MG737192  | In this study   |
| <b>13-3 (KAGWH)</b>       | B-2               | Human serum                      | Korea               | 2013.5            | MG736975              | MG737084  | MG737193  | In this study   |
| <b>13-4 (KACNH)</b>       | D                 | Human serum                      | Korea               | 2013.6            | MG736976              | MG737085  | MG920818  | In this study   |
| <b>13-5 (KAGBH2)</b>      | B-2               | Human serum                      | Korea               | 2013.6            | MG736977              | MG737086  | MG737194  | In this study   |

## Supplemental data

|                       |                   |             |       |         |          |          |          |               |
|-----------------------|-------------------|-------------|-------|---------|----------|----------|----------|---------------|
| <b>13-7 (KAGNH2)</b>  | Reassortant (R-3) | Human serum | Korea | 2013.7  | MG736978 | MG737087 | MG737195 | In this study |
| <b>13-8 (KAGBH3)</b>  | B-2               | Human serum | Korea | 2013.7  | MG736979 | MG737088 | MG737196 | In this study |
| <b>13-9 (KAJNH)</b>   | A                 | Human serum | Korea | 2013.7  | MG736980 | MG737089 | MG737197 | In this study |
| <b>13-11 (KAICH)</b>  | A                 | Human serum | Korea | 2013.7  | MG736981 | MG737090 | MG737198 | In this study |
| <b>13-12 (KAJJH2)</b> | B-3               | Human serum | Korea | 2013.7  | MG736982 | MG737091 | MG737199 | In this study |
| <b>13-13 (KACNH2)</b> | Reassortant (R-4) | Human serum | Korea | 2013.8  | MG736983 | MG737092 | MG737200 | In this study |
| <b>13-15 (KAUSH)</b>  | Reassortant (R-3) | Human serum | Korea | 2013.8  | MG736984 | MG737093 | MG737201 | In this study |
| <b>13-16 (KAUSH2)</b> | B-2               | Human serum | Korea | 2013.8  | MG736985 | MG737094 | MG737202 | In this study |
| <b>13-17 (KAGWH2)</b> | A                 | Human serum | Korea | 2013.8  | MG736986 | MG737095 | MG737203 | In this study |
| <b>13-18 (KADGH2)</b> | B-2               | Human serum | Korea | 2013.8  | MG736987 | MG737096 | MG737204 | In this study |
| <b>13-19 (KAJNH3)</b> | B-3               | Human serum | Korea | 2013.9  | MG736988 | MG737097 | MG737205 | In this study |
| <b>13-20 (KAGNH3)</b> | B-3               | Human serum | Korea | 2013.9  | MG736989 | MG737098 | MG737206 | In this study |
| <b>13-21 (KAGBH4)</b> | B-2               | Human serum | Korea | 2013.10 | MG736990 | MG737099 | MG737207 | In this study |
| <b>13-22 (KADGH3)</b> | B-2               | Human serum | Korea | 2013.10 | MG736991 | MG737100 | MG737208 | In this study |
| <b>13-25 (KASUH)</b>  | B-2               | Human serum | Korea | 2013.10 | MG736992 | MG737101 | MG737209 | In this study |
| <b>13-26 (KADGH5)</b> | B-2               | Human serum | Korea | 2013.11 | MG736993 | MG737102 | MG737210 | In this study |
| <b>14-5 (14KS22)</b>  | B-2               | Human serum | Korea | 2014.7  | MG736994 | MG737103 | MG737211 | In this study |
| <b>14-6 (14KS25)</b>  | Reassortant (R-3) | Human serum | Korea | 2014.7  | MG736995 | MG737104 | MG737212 | In this study |
| <b>14-8 (14KS27)</b>  | B-2               | Human serum | Korea | 2014.7  | MG736996 | MG737105 | MG737213 | In this study |
| <b>14-9 (14KS30)</b>  | B-3               | Human serum | Korea | 2014.7  | MG736997 | MG737106 | MG737214 | In this study |
| <b>14-10 (14KS33)</b> | Reassortant (R-2) | Human serum | Korea | 2014.8  | MG736998 | MG737107 | MG737215 | In this study |
| <b>14-11 (14KS35)</b> | F                 | Human serum | Korea | 2014.8  | MG736999 | MG737108 | MG737216 | In this study |
| <b>14-12 (14KS38)</b> | B-3               | Human serum | Korea | 2014.8  | MG737000 | MG737109 | MG737217 | In this study |
| <b>14-13 (14KS39)</b> | F                 | Human serum | Korea | 2014.8  | MG737001 | MG737110 | MG737218 | In this study |
| <b>14-14 (14KS42)</b> | B-2               | Human serum | Korea | 2014.8  | MG737002 | MG737111 | MG737219 | In this study |
| <b>14-15 (14KS44)</b> | Reassortant (R-2) | Human serum | Korea | 2014.9  | MG737003 | MG737112 | MG737220 | In this study |



## Supplemental data

|                          |     |             |       |         |          |          |          |               |
|--------------------------|-----|-------------|-------|---------|----------|----------|----------|---------------|
| <b>14-16 (14KS46)</b>    | B-2 | Human serum | Korea | 2014.9  | MG737004 | MG737113 | MG737221 | In this study |
| <b>14-17 (14KS47)</b>    | F   | Human serum | Korea | 2014.9  | MG737005 | MG737114 | MG737222 | In this study |
| <b>14-18 (14KS48,49)</b> | B-2 | Human serum | Korea | 2014.9  | MG737006 | MG737115 | MG737223 | In this study |
| <b>14-19 (14KS52)</b>    | A   | Human serum | Korea | 2014.10 | MG737007 | MG737116 | MG737224 | In this study |
| <b>14-20 (14KS53,55)</b> | B-1 | Human serum | Korea | 2014.9  | MG737008 | MG737117 | MG737225 | In this study |
| <b>14-21 (14KS58)</b>    | D   | Human serum | Korea | 2014.9  | MG737009 | MG737118 | MG737226 | In this study |
| <b>14-22 (14KS62)</b>    | B-2 | Human serum | Korea | 2014.10 | MG737010 | MG737119 | MG737227 | In this study |
| <b>14-23 (14KS64)</b>    | D   | Human serum | Korea | 2014.10 | MG737011 | MG737120 | MG737228 | In this study |
| <b>14-24 (14KS72)</b>    | B-2 | Human serum | Korea | 2014.10 | MG737012 | MG737121 | MG737229 | In this study |
| <b>14-25 (14KS73)</b>    | B-2 | Human serum | Korea | 2014.10 | MG737013 | MG737122 | MG737230 | In this study |
| <b>15-1 (15KS5)</b>      | B-3 | Human serum | Korea | 2015.5  | MG737014 | MG737123 | MG737231 | In this study |
| <b>15-3 (15KS8)</b>      | F   | Human serum | Korea | 2015.5  | MG737015 | MG737124 | MG737232 | In this study |
| <b>15-4 (15KS9)</b>      | B-2 | Human serum | Korea | 2015.5  | MG737016 | MG737125 | MG737233 | In this study |
| <b>15-6 (15KS10)</b>     | B-2 | Human serum | Korea | 2015.5  | MG737017 | MG737126 | MG737234 | In this study |
| <b>15-8 (15MS31)</b>     | F   | Human serum | Korea | 2015.6  | MG737018 | MG737127 | MG737235 | In this study |
| <b>15-10 (15MS32)</b>    | B-1 | Human serum | Korea | 2015.6  | MG737019 | MG737128 | MG737236 | In this study |
| <b>15-11 (15KS15)</b>    | B-3 | Human serum | Korea | 2015.6  | MG920819 | MG920820 | MG920821 | In this study |
| <b>15-12 (15KS16)</b>    | B-2 | Human serum | Korea | 2015.6  | MG737020 | MG737129 | MG737237 | In this study |
| <b>15-15 (15KS19)</b>    | B-2 | Human serum | Korea | 2015.6  | MG737021 | MG737130 | MG737238 | In this study |
| <b>15-16 (15KS20)</b>    | B-2 | Human serum | Korea | 2015.7  | MG737022 | MG737131 | MG737239 | In this study |
| <b>15-17 (15KS23)</b>    | B-2 | Human serum | Korea | 2015.7  | MG737023 | MG737132 | MG737240 | In this study |
| <b>15-18 (15KS25)</b>    | B-2 | Human serum | Korea | 2015.7  | MG737024 | MG737133 | MG737241 | In this study |
| <b>15-19 (15KS26)</b>    | B-2 | Human serum | Korea | 2015.7  | MG737025 | MG737134 | MG737242 | In this study |
| <b>15-20 (15MS65)</b>    | B-3 | Human serum | Korea | 2015.7  | MG920822 | MG920823 | MG920824 | In this study |
| <b>15-21 (15KS28)</b>    | B-2 | Human serum | Korea | 2015.7  | MG737026 | MG737135 | MG737243 | In this study |
| <b>15-22 (15KS29)</b>    | B-3 | Human serum | Korea | 2015.7  | MG737027 | MG737136 | MG737244 | In this study |
| <b>15-23 (15KS31)</b>    | B-2 | Human serum | Korea | 2015.7  | MG737028 | MG737137 | MG737245 | In this study |
| <b>15-24 (15KS33)</b>    | B-3 | Human serum | Korea | 2015.7  | MG737029 | MG737138 | MG737246 | In this study |
| <b>15-25 (15KS43)</b>    | B-2 | Human serum | Korea | 2015.8  | MG920825 | MG920826 | MG920827 | In this study |
| <b>15-26 (15KS47)</b>    | B-3 | Human serum | Korea | 2015.8  | MG920828 | MG920829 | MG920830 | In this study |
| <b>15-28 (15KS50)</b>    | B-3 | Human serum | Korea | 2015.8  | MG737030 | MG737139 | MG737247 | In this study |

## Supplemental data

|                              |                   |             |       |         |          |          |          |               |
|------------------------------|-------------------|-------------|-------|---------|----------|----------|----------|---------------|
| <b>15-29 (15MS104)</b>       | B-3               | Human serum | Korea | 2015.9  | MG737031 | MG737140 | MG737248 | In this study |
| <b>15-30 (15KS51)</b>        | B-3               | Human serum | Korea | 2015.9  | MG921166 | MG921167 | MG921168 | In this study |
| <b>15-32 (15Asan_Serum1)</b> | B-3               | Human serum | Korea | 2015.9  | MG737032 | MG737141 | MG737249 | In this study |
| <b>15-33 (15KS57)</b>        | A                 | Human serum | Korea | 2015.9  | MG737033 | MG737142 | MG737250 | In this study |
| <b>15-34 (15KS59)</b>        | B-3               | Human serum | Korea | 2015.9  | MG737034 | MG737143 | MG737251 | In this study |
| <b>15-35 (15KS61)</b>        | B-3               | Human serum | Korea | 2015.10 | MG737035 | MG737144 | MG737252 | In this study |
| <b>15-36 (15KS62)</b>        | B-3               | Human serum | Korea | 2015.9  | MG737036 | MG737145 | MG737253 | In this study |
| <b>15-37 (15KS64)</b>        | A                 | Human serum | Korea | 2015.9  | MG737037 | MG737146 | MG737254 | In this study |
| <b>15-38 (15KS67)</b>        | Reassortant (R-2) | Human serum | Korea | 2015.9  | MG737038 | MG737147 | MG737255 | In this study |
| <b>15-39 (15KS71)</b>        | B-2               | Human serum | Korea | 2015.10 | MG737039 | MG737148 | MG737256 | In this study |
| <b>15-40 (15KS72)</b>        | B-2               | Human serum | Korea | 2015.10 | MG737040 | MG737149 | MG737257 | In this study |
| <b>15-41 (15KS73)</b>        | F                 | Human serum | Korea | 2015.10 | MG737041 | MG737150 | MG737258 | In this study |
| <b>15-42 (15MS132)</b>       | B-2               | Human serum | Korea | 2015.10 | MG737042 | MG737151 | MG737259 | In this study |
| <b>15-43 (15KS74)</b>        | B-2               | Human serum | Korea | 2015.10 | MG737043 | MG737152 | MG737260 | In this study |
| <b>15-44 (15KS75)</b>        | B-1               | Human serum | Korea | 2015.10 | MG921169 | MG921170 | MG921171 | In this study |
| <b>15-45 (15KS77)</b>        | B-3               | Human serum | Korea | 2015.11 | MG737044 | MG737153 | MG737261 | In this study |
| <b>16-26 (16KS54)</b>        | Reassortant (R-3) | Human serum | Korea | 2016.8  | MG737045 | MG737154 | MG737262 | In this study |
| <b>16-27 (16KS55)</b>        | Reassortant (R-6) | Human serum | Korea | 2016.8  | MG737046 | MG737155 | MG737263 | In this study |
| <b>16-28 (16MS239)</b>       | B-1               | Human serum | Korea | 2016.8  | MG737047 | MG737156 | MG737264 | In this study |
| <b>16-29 (16KS62)</b>        | B-3               | Human serum | Korea | 2016.8  | MG737048 | MG737157 | MG737265 | In this study |
| <b>16-30 (16KS63)</b>        | B-3               | Human serum | Korea | 2016.8  | MG737049 | MG737158 | MG737266 | In this study |
| <b>16-31 (16MS269)</b>       | B-2               | Human serum | Korea | 2016.9  | MG737050 | MG737159 | MG737267 | In this study |
| <b>16-32 (16KS71)</b>        | B-1               | Human serum | Korea | 2016.9  | MG737051 | MG737160 | MG737268 | In this study |
| <b>16-33 (16MS286)</b>       | B-1               | Human serum | Korea | 2016.9  | MG737052 | MG737161 | MG737269 | In this study |
| <b>16-34 (16KS77)</b>        | Reassortant (R-8) | Human serum | Korea | 2016.9  | MG737053 | MG737162 | MG737270 | In this study |
| <b>16-35 (16KS80)</b>        | B-1               | Human serum | Korea | 2016.9  | MG737054 | MG737163 | MG737271 | In this study |
| <b>16-36 (16KS83)</b>        | B-3               | Human serum | Korea | 2016.9  | MG737055 | MG737164 | MG737272 | In this study |

## Supplemental data

|                        |                   |             |       |         |          |          |          |               |
|------------------------|-------------------|-------------|-------|---------|----------|----------|----------|---------------|
| <b>16-37 (16KS85)</b>  | B-2               | Human serum | Korea | 2016.10 | MG737056 | MG737165 | MG737273 | In this study |
| <b>16-38 (16KS86)</b>  | B-2               | Human serum | Korea | 2016.10 | MG737057 | MG737166 | MG737274 | In this study |
| <b>16-39 (16KS89)</b>  | F                 | Human serum | Korea | 2016.9  | MG737058 | MG737167 | MG737275 | In this study |
| <b>16-40 (16KS92)</b>  | B-2               | Human serum | Korea | 2016.10 | MG737059 | MG737168 | MG737276 | In this study |
| <b>16-41 (16MS299)</b> | Reassortant (R-1) | Human serum | Korea | 2016.9  | MG737060 | MG737169 | MG737277 | In this study |
| <b>16-42 (16MS300)</b> | F                 | Human serum | Korea | 2016.9  | MG737061 | MG737170 | MG737278 | In this study |
| <b>16-43 (16MS310)</b> | Reassortant (R-2) | Human serum | Korea | 2016.10 | MG737062 | MG737171 | MG737279 | In this study |
| <b>16-44 (16MS313)</b> | B-3               | Human serum | Korea | 2016.10 | MG737063 | MG737172 | MG737280 | In this study |
| <b>16-45 (16MS315)</b> | B-1               | Human serum | Korea | 2016.10 | MG737064 | MG737173 | MG737281 | In this study |
| <b>16-46 (16MS322)</b> | Reassortant (R-5) | Human serum | Korea | 2016.10 | MG737065 | MG737174 | MG737282 | In this study |
| <b>16-47 (16KS96)</b>  | A                 | Human serum | Korea | 2016.10 | MG737066 | MG737175 | MG737283 | In this study |
| <b>16-48 (16KS100)</b> | B-1               | Human serum | Korea | 2016.10 | MG737067 | MG737176 | MG737284 | In this study |
| <b>16-49 (16MS323)</b> | B-2               | Human serum | Korea | 2016.10 | MG737068 | MG737177 | MG737285 | In this study |
| <b>16-50 (16MS344)</b> | B-1               | Human serum | Korea | 2016.10 | MG737069 | MG737178 | MG737286 | In this study |
| <b>16-51 (16MS347)</b> | B-2               | Human serum | Korea | 2016.10 | MG737070 | MG737179 | MG737287 | In this study |
| <b>16-52 (16MS351)</b> | B-2               | Human serum | Korea | 2016.10 | MG737071 | MG737180 | MG737288 | In this study |
| <b>16-53 (16MS368)</b> | B-3               | Human serum | Korea | 2016.10 | MG737072 | MG737181 | MG737289 | In this study |
| <b>16-54 (16MS373)</b> | Reassortant (R-9) | Human serum | Korea | 2016.11 | MG737073 | MG737182 | MG737290 | In this study |
| <b>16-55 (16KS104)</b> | B-1               | Human serum | Korea | 2016.10 | MG737074 | MG737183 | MG737291 | In this study |
| <b>16-56 (16KS108)</b> | B-2               | Human serum | Korea | 2016.10 | MG737075 | MG737184 | MG737292 | In this study |
| <b>16-57 (16KS112)</b> | B-1               | Human serum | Korea | 2016.10 | MG737076 | MG737185 | MG737293 | In this study |
| <b>16-58 (16KS115)</b> | A                 | Human serum | Korea | 2016.10 | MG737077 | MG737186 | MG737294 | In this study |
| <b>16-59 (16KS116)</b> | B-1               | Human serum | Korea | 2016.10 | MG737078 | MG737187 | MG737295 | In this study |
| <b>16-60 (16KS126)</b> | B-1               | Human serum | Korea | 2016.9  | MG737079 | MG737188 | MG737296 | In this study |
| <b>16-61 (16KS128)</b> | B-2               | Human serum | Korea | 2016.11 | MG737080 | MG737189 | MG737297 | In this study |
| <b>16-62 (16KS129)</b> | B-3               | Human serum | Korea | 2016.11 | MG737081 | MG737190 | MG737298 | In this study |
| <b>YG1</b>             | B-2               | Human serum | Japan | 2012    | AB817979 | AB817987 | AB817995 | GenBank       |
| <b>SPL003A</b>         | B-2               | Human serum | Japan | 2012    | AB817980 | AB817988 | AB817996 | GenBank       |

## Supplemental data

|                |             |             |       |      |          |          |          |         |
|----------------|-------------|-------------|-------|------|----------|----------|----------|---------|
| <b>SPL004A</b> | B-3         | Human serum | Japan | 2012 | AB817981 | AB817989 | AB817997 | GenBank |
| <b>SPL005A</b> | B-2         | Human serum | Japan | 2012 | AB817982 | AB817990 | AB817998 | GenBank |
| <b>SPL010A</b> | B-2         | Human serum | Japan | 2005 | AB817983 | AB817991 | AB817999 | GenBank |
| <b>SPL030A</b> | B-2         | Human serum | Japan | 2010 | AB817984 | AB817992 | AB818000 | GenBank |
| <b>SPL032A</b> | B-2         | Human serum | Japan | 2005 | AB817985 | AB817993 | AB818001 | GenBank |
| <b>SPL035A</b> | B-2         | Human serum | Japan | 2012 | AB817986 | AB817994 | AB818002 | GenBank |
| <b>SPL053A</b> | B-2         | Human serum | Japan | 2012 | AB983497 | AB985292 | AB985523 | GenBank |
| <b>SPL054A</b> | B-2         | Human serum | Japan | 2013 | AB983498 | AB985293 | AB985524 | GenBank |
| <b>SPL055A</b> | B-2         | Human serum | Japan | 2013 | AB983499 | AB985294 | AB985525 | GenBank |
| <b>SPL057A</b> | Reassortant | Human serum | Japan | 2013 | AB983500 | AB985295 | AB985526 | GenBank |
| <b>SPL060A</b> | B-2         | Human serum | Japan | 2013 | AB983501 | AB985296 | AB985527 | GenBank |
| <b>SPL062A</b> | B-2         | Human serum | Japan | 2013 | AB983502 | AB985297 | AB985528 | GenBank |
| <b>SPL066A</b> | B-2         | Human serum | Japan | 2013 | AB983503 | AB985298 | AB985529 | GenBank |
| <b>SPL067A</b> | B-2         | Human serum | Japan | 2013 | AB983504 | AB985299 | AB985530 | GenBank |
| <b>SPL069A</b> | B-2         | Human serum | Japan | 2013 | AB983505 | AB985300 | AB985531 | GenBank |
| <b>SPL070A</b> | B-2         | Human serum | Japan | 2013 | AB983506 | AB985301 | AB985532 | GenBank |
| <b>SPL071A</b> | B-2         | Human serum | Japan | 2013 | AB983507 | AB985302 | AB985533 | GenBank |
| <b>SPL075A</b> | B-2         | Human serum | Japan | 2013 | AB983509 | AB985303 | AB985535 | GenBank |
| <b>SPL077A</b> | B-2         | Human serum | Japan | 2013 | AB983510 | AB985304 | AB985536 | GenBank |
| <b>SPL078A</b> | B-2         | Human serum | Japan | 2013 | AB983511 | AB985305 | AB985537 | GenBank |
| <b>SPL082A</b> | B-2         | Human serum | Japan | 2013 | AB983512 | AB985306 | AB985538 | GenBank |
| <b>SPL084A</b> | B-2         | Human serum | Japan | 2013 | AB983513 | AB985307 | AB985539 | GenBank |
| <b>SPL086A</b> | B-2         | Human serum | Japan | 2013 | AB983514 | AB985308 | AB985540 | GenBank |
| <b>SPL087A</b> | Reassortant | Human serum | Japan | 2013 | AB983515 | AB985309 | AB985541 | GenBank |
| <b>SPL089A</b> | B-2         | Human serum | Japan | 2013 | AB983516 | AB985310 | AB985542 | GenBank |
| <b>SPL090A</b> | B-2         | Human serum | Japan | 2013 | AB983517 | AB985311 | AB985543 | GenBank |
| <b>SPL097A</b> | Reassortant | Human serum | Japan | 2013 | AB983518 | AB985312 | AB985544 | GenBank |
| <b>SPL100A</b> | Reassortant | Human serum | Japan | 2013 | AB983519 | AB985313 | AB985545 | GenBank |
| <b>SPL104A</b> | B-2         | Human serum | Japan | 2013 | AB983520 | AB985314 | AB985546 | GenBank |
| <b>SPL105A</b> | B-2         | Human serum | Japan | 2013 | AB983521 | AB985315 | AB985547 | GenBank |
| <b>SPL106A</b> | B-2         | Human serum | Japan | 2013 | AB983522 | AB985316 | AB985548 | GenBank |



## Supplemental data

|                         |     |                                  |       |        |          |          |          |         |
|-------------------------|-----|----------------------------------|-------|--------|----------|----------|----------|---------|
| <b>SPL107A</b>          | B-2 | Human serum                      | Japan | 2013   | AB983523 | AB985317 | AB985549 | GenBank |
| <b>SPL108A</b>          | B-2 | Human serum                      | Japan | 2013   | AB983524 | AB985318 | AB985550 | GenBank |
| <b>SPL112A</b>          | B-2 | Human serum                      | Japan | 2013   | AB983525 | AB985319 | AB985551 | GenBank |
| <b>SPL114A</b>          | B-2 | Human serum                      | Japan | 2013   | AB983526 | AB985320 | AB985552 | GenBank |
| <b>SPL117A</b>          | B-2 | Human serum                      | Japan | 2013   | AB983527 | AB985321 | AB985553 | GenBank |
| <b>SPL120A</b>          | B-2 | Human serum                      | Japan | 2012   | AB983528 | AB985322 | AB985554 | GenBank |
| <b>SPL121A</b>          | B-2 | Human serum                      | Japan | 2013   | AB983529 | AB985323 | AB985555 | GenBank |
| <b>SPL124A</b>          | B-2 | Human serum                      | Japan | 2013   | AB983530 | AB985324 | AB985556 | GenBank |
| <b>SPL128A</b>          | B-2 | Human serum                      | Japan | 2014   | AB983532 | AB985325 | AB985558 | GenBank |
| <b>SPL129A</b>          | B-3 | Human serum                      | Japan | 2014   | AB983533 | AB985326 | AB985559 | GenBank |
| <b>SDLZtick12/2010</b>  | F   | <i>Haemaphysalis longicornis</i> | China | 2010.7 | JQ684871 | JQ684872 | JQ684873 | GenBank |
| <b>HB154/China/2011</b> | D   | Human serum                      | China | 2011.8 | JQ733561 | JQ733560 | JQ733562 | GenBank |
| <b>HB155/China/2011</b> | D   | Human serum                      | China | 2011.8 | JQ733564 | JQ733563 | JQ733565 | GenBank |
| <b>HB156/China/2011</b> | D   | Human serum                      | China | 2011.8 | JQ733567 | JQ733566 | JQ733568 | GenBank |
| <b>HXY_207</b>          | F   | Human serum                      | China | 2011   | KC292341 | KC292315 | KC292288 | GenBank |
| <b>HXY_170</b>          | F   | Human serum                      | China | 2011   | KC292353 | KC292304 | KC292277 | GenBank |
| <b>HXY_130</b>          | F   | Human serum                      | China | 2011   | KC292342 | KC292316 | KC292289 | GenBank |
| <b>HXY_224</b>          | F   | Human serum                      | China | 2011   | KC292343 | KC292317 | KC292290 | GenBank |
| <b>HXY_2</b>            | F   | Human serum                      | China | 2011   | KC292344 | KC292318 | KC292291 | GenBank |
| <b>HXY_319</b>          | F   | Human serum                      | China | 2011   | KC292345 | KC292319 | KC292292 | GenBank |
| <b>HXY_245</b>          | F   | Human serum                      | China | 2011   | KC292346 | KC292320 | KC292293 | GenBank |
| <b>HXY_327</b>          | D   | Human serum                      | China | 2011   | KC292347 | KC292321 | KC292294 | GenBank |
| <b>HXY_278</b>          | A   | Human serum                      | China | 2011   | KC292348 | KC292322 | KC292295 | GenBank |
| <b>HXY_191</b>          | A   | Human serum                      | China | 2011   | KC292349 | KC292323 | KC292296 | GenBank |
| <b>HXY_182</b>          | F   | Human serum                      | China | 2011   | KC292350 | KC292324 | KC292297 | GenBank |
| <b>HXY_202</b>          | F   | Human serum                      | China | 2011   | KC292351 | KC292325 | KC292298 | GenBank |
| <b>HXY_195</b>          | F   | Human serum                      | China | 2011   | KC292352 | KC292326 | KC292299 | GenBank |
| <b>HXY_188</b>          | A   | Human serum                      | China | 2011   | KC292328 | KC292301 | KC292274 | GenBank |
| <b>HXY_206</b>          | A   | Human serum                      | China | 2011   | KC292329 | KC292302 | KC292275 | GenBank |
| <b>HXY_212</b>          | D   | Human serum                      | China | 2011   | KC292327 | KC292300 | KC292273 | GenBank |
| <b>HXY_293</b>          | F   | Human serum                      | China | 2011   | KC292330 | KC292303 | KC292276 | GenBank |

## Supplemental data

|                             |             |                                  |       |         |          |          |          |         |
|-----------------------------|-------------|----------------------------------|-------|---------|----------|----------|----------|---------|
| <b><i>HNXY_157</i></b>      | F           | Human serum                      | China | 2011    | KC292331 | KC292305 | KC292278 | GenBank |
| <b><i>HNXY_174</i></b>      | F           | Human serum                      | China | 2011    | KC292332 | KC292306 | KC292279 | GenBank |
| <b><i>HNXY_144</i></b>      | F           | Human serum                      | China | 2011    | KC292333 | KC292307 | KC292280 | GenBank |
| <b><i>HNXY_186</i></b>      | F           | Human serum                      | China | 2011    | KC292334 | KC292308 | KC292281 | GenBank |
| <b><i>HNXY_262</i></b>      | F           | Human serum                      | China | 2011    | KC292335 | KC292309 | KC292282 | GenBank |
| <b><i>HNXY_31</i></b>       | F           | Human serum                      | China | 2011    | KC292336 | KC292310 | KC292283 | GenBank |
| <b><i>HNXY_93</i></b>       | F           | Human serum                      | China | 2011    | KC292337 | KC292311 | KC292284 | GenBank |
| <b><i>HNXY_115</i></b>      | F           | Human serum                      | China | 2011    | KC292338 | KC292312 | KC292285 | GenBank |
| <b><i>HNXY_231</i></b>      | F           | Human serum                      | China | 2011    | KC292339 | KC292313 | KC292286 | GenBank |
| <b><i>HNXY_164</i></b>      | F           | Human serum                      | China | 2011    | KC292340 | KC292314 | KC292287 | GenBank |
| <b><i>JS2012-tick01</i></b> | F           | <i>Haemaphysalis longicornis</i> | China | 2012.9  | KC473540 | KC473541 | KC473542 | GenBank |
| <b><i>JS2012-goat01</i></b> | F           | Goat                             | China | 2012.9  | KC473537 | KC473538 | KC473539 | GenBank |
| <b><i>JS2007-01</i></b>     | Reassortant | Human serum                      | China | 2007    | JF837593 | JF837594 | JF837595 | GenBank |
| <b><i>JS2010-014</i></b>    | F           | Human serum                      | China | 2010.11 | JQ317169 | JQ317170 | JQ317171 | GenBank |
| <b><i>JS2010-015</i></b>    | F           | Human serum                      | China | 2010.11 | JQ317172 | JQ317173 | JQ317174 | GenBank |
| <b><i>JS2010-018</i></b>    | F           | Human serum                      | China | 2010.12 | JQ317175 | JQ317176 | JQ317177 | GenBank |
| <b><i>JS2010-019</i></b>    | F           | Human serum                      | China | 2011.1  | JQ317178 | JQ317179 | JQ317180 | GenBank |
| <b><i>JS2011-004</i></b>    | A           | Human serum                      | China | 2012.3  | KC505123 | KC505124 | KC505125 | GenBank |
| <b><i>JS2011-013-1</i></b>  | F           | Human serum                      | China | 2012.3  | KC505126 | KC505127 | KC505128 | GenBank |
| <b><i>JS2011-027</i></b>    | A           | Human serum                      | China | 2012.3  | KC505129 | KC505130 | KC505131 | GenBank |
| <b><i>JS2011-034</i></b>    | F           | Human serum                      | China | 2012.3  | KC505132 | KC505133 | KC505134 | GenBank |
| <b><i>JS2011-062</i></b>    | D           | Human serum                      | China | 2012.3  | KC505135 | KC505136 | KC505137 | GenBank |
| <b><i>JS2011-109</i></b>    | A           | Human serum                      | China | 2012.3  | KC505138 | KC505139 | KC505140 | GenBank |
| <b><i>JS2012-020</i></b>    | A           | Human serum                      | China | 2012.3  | KC505141 | KC505142 | KC505143 | GenBank |
| <b><i>JS2012-035</i></b>    | A           | Human serum                      | China | 2012.3  | KC505144 | KC505145 | KC505146 | GenBank |
| <b><i>Zhao</i></b>          | B-3         | Human serum                      | China | 2013.3  | KF374682 | KF374684 | KF374683 | GenBank |
| <b><i>HL/Injected</i></b>   | A           | Human serum                      | China | 2013.9  | KF791958 | KF791953 | KF791948 | GenBank |
| <b><i>HL/Egg/G2</i></b>     | A           | <i>Haemaphysalis longicornis</i> | China | 2013.9  | KF791959 | KF791954 | KF791949 | GenBank |

## Supplemental data

|                         |             |                                  |       |         |          |          |          |         |
|-------------------------|-------------|----------------------------------|-------|---------|----------|----------|----------|---------|
| <b>HL/Larvae/G2</b>     | A           | <i>Haemaphysalis longicornis</i> | China | 2013.9  | KF791960 | KF791955 | KF791950 | GenBank |
| <b>HL/Nymph/G2</b>      | A           | <i>Haemaphysalis longicornis</i> | China | 2013.9  | KF791961 | KF791956 | KF791951 | GenBank |
| <b>HL/Adult/G2</b>      | A           | <i>Haemaphysalis longicornis</i> | China | 2013.9  | KF791962 | KF791957 | KF791952 | GenBank |
| <b>LN2012-14</b>        | Reassortant | Human serum                      | China | 2012.7  | KF887441 | KF887436 | KF887431 | GenBank |
| <b>LN2012-34</b>        | Reassortant | Human serum                      | China | 2012.7  | KF887442 | KF887437 | KF887432 | GenBank |
| <b>LN2012-41</b>        | Reassortant | Human serum                      | China | 2012.8  | KF887443 | KF887438 | KF887433 | GenBank |
| <b>LN2012-42</b>        | Reassortant | Human serum                      | China | 2012.8  | KF887444 | KF887439 | KF887434 | GenBank |
| <b>LN2012-58</b>        | Reassortant | Human serum                      | China | 2012.8  | KF887445 | KF887440 | KF887435 | GenBank |
| <b>Zhejiang/01/2011</b> | B-3         | Human serum                      | China | 2011.6  | KJ597825 | KJ597824 | KJ597823 | GenBank |
| <b>ZJ2013-06</b>        | Reassortant | Human serum                      | China | 2013.10 | KP280206 | KP280204 | KP280205 | GenBank |
| <b>AH15</b>             | A           | Human serum                      | China | 2010.8  | HQ141592 | HQ141593 | HQ141594 | GenBank |
| <b>HN13</b>             | A           | Human serum                      | China | 2010.7  | HQ141598 | HQ141599 | HQ141600 | GenBank |
| <b>YXX2</b>             | A           | Human serum                      | China | 2011.5  | KF356546 | KF356534 | KF356522 | GenBank |
| <b>2012YXX1</b>         | A           | Human serum                      | China | 2012.8  | KF711862 | KF711929 | KF711901 | GenBank |
| <b>2010-FQM</b>         | A           | NA                               | China | 2010    | HQ419227 | HQ419236 | HQ419240 | GenBank |
| <b>JS3</b>              | A           | Human serum                      | China | 2010.8  | HQ141601 | HQ141602 | HQ141603 | GenBank |
| <b>JS4</b>              | E           | Human serum                      | China | 2010.8  | HQ141604 | HQ141605 | HQ141606 | GenBank |
| <b>JS6</b>              | A           | Human serum                      | China | 2010.10 | HQ830169 | HQ830170 | HQ830171 | GenBank |
| <b>JS24</b>             | A           | Human serum                      | China | 2010.11 | HQ830163 | HQ830164 | HQ830165 | GenBank |
| <b>JS26</b>             | A           | Human serum                      | China | 2010.11 | HQ830166 | HQ830167 | HQ830168 | GenBank |
| <b>LN2/China/2010</b>   | F           | Human serum                      | China | 2010.7  | HQ141607 | HQ141608 | HQ141609 | GenBank |
| <b>LN3/China/2010</b>   | A           | Human serum                      | China | 2010.7  | HQ141610 | HQ141611 | HQ141612 | GenBank |
| <b>2011YSC60</b>        | Reassortant | Human serum                      | China | 2011.8  | KF711863 | KF711945 | KF711899 | GenBank |
| <b>AHL/China/2011</b>   | Reassortant | Human serum                      | China | 2011.6  | JQ670934 | JQ670930 | JQ670932 | GenBank |
| <b>YSHX002</b>          | D           | Human serum                      | China | 2012    | KF356551 | KF356540 | KF356528 | GenBank |
| <b>YGS1</b>             | D           | Human serum                      | China | 2011.4  | KF356549 | KF356537 | KF356525 | GenBank |
| <b>YSC19</b>            | D           | Human serum                      | China | 2011.5  | KF356548 | KF356536 | KF356524 | GenBank |
| <b>2011YGS5</b>         | D           | Human serum                      | China | 2011.8  | KF711884 | KF711925 | KF711893 | GenBank |

## Supplemental data

|                            |   |             |       |        |          |          |          |         |
|----------------------------|---|-------------|-------|--------|----------|----------|----------|---------|
| <b>2011YSC22</b>           | D | Human serum | China | 2011.8 | KF711888 | KF711927 | KF711894 | GenBank |
| <b>2011YGS7</b>            | D | Human serum | China | 2011.8 | KF711885 | KF711922 | KF711895 | GenBank |
| <b>2011YPQ17</b>           | D | Human serum | China | 2011.8 | KF711887 | KF711923 | KF711896 | GenBank |
| <b>2011YPQ11</b>           | D | Human serum | China | 2011.8 | KF711886 | KF711926 | KF711897 | GenBank |
| <b>2012YSH91</b>           | D | Human serum | China | 2012.8 | KF711883 | KF711920 | KF711891 | GenBank |
| <b>2011YXX9</b>            | D | Human serum | China | 2011.8 | KF711889 | KF711924 | KF711898 | GenBank |
| <b>2012YSH9</b>            | D | Human serum | China | 2012.8 | KF711881 | KF711919 | KF711890 | GenBank |
| <b>2012YSH6</b>            | D | Human serum | China | 2012.8 | KF711882 | KF711921 | KF711892 | GenBank |
| <b>2010-WSQ</b>            | D | NA          | China | 2010   | HQ419226 | HQ419235 | HQ419239 | GenBank |
| <b>SD24</b>                | D | Human serum | China | 2010   | HM802200 | HM802201 | HM802205 | GenBank |
| <b>SD4</b>                 | E | Human serum | China | 2010   | HM802202 | HM802203 | HM802204 | GenBank |
| <b>AH12</b>                | F | Human serum | China | 2010.8 | HQ116417 | HQ141590 | HQ141591 | GenBank |
| <b>AHZ/China/2011</b>      | F | Human serum | China | 2011.7 | JQ670929 | JQ670931 | JQ670933 | GenBank |
| <b>BX-2010/Henan/CHN</b>   | F | NA          | China | 2010   | HQ642766 | HQ642767 | HQ642768 | GenBank |
| <b>HN6</b>                 | F | Human serum | China | 2010.7 | HQ141595 | HQ141596 | HQ141597 | GenBank |
| <b>HN-LR/China/05/2012</b> | F | Human serum | China | 2012.5 | KR017842 | KR017861 | KR017823 | GenBank |
| <b>YNY1</b>                | F | Human serum | China | 2011.7 | KF356552 | KF356538 | KF356526 | GenBank |
| <b>YPQX03</b>              | F | Human serum | China | 2012   | KF356550 | KF356539 | KF356527 | GenBank |
| <b>YPQ2</b>                | F | Human serum | China | 2011.4 | KF356543 | KF356531 | KF356519 | GenBank |
| <b>YPQ5</b>                | F | Human serum | China | 2011.5 | KF356544 | KF356532 | KF356520 | GenBank |
| <b>YXX1</b>                | F | Human serum | China | 2011.5 | KF356545 | KF356533 | KF356521 | GenBank |
| <b>YSH39</b>               | F | Human serum | China | 2011.6 | KF356541 | KF356529 | KF356517 | GenBank |
| <b>YPQ133</b>              | F | Human serum | China | 2011.7 | KF356542 | KF356530 | KF356518 | GenBank |
| <b>2012YGS4</b>            | F | Human serum | China | 2012.8 | KF711875 | KF711933 | KF711904 | GenBank |
| <b>2012YSH37</b>           | F | Human serum | China | 2012.8 | KF711871 | KF711936 | KF711905 | GenBank |
| <b>2012YGS10</b>           | F | Human serum | China | 2012.8 | KF711872 | KF711937 | KF711909 | GenBank |
| <b>2012YSH86</b>           | F | Human serum | China | 2012.8 | KF711877 | KF711939 | KF711907 | GenBank |
| <b>2012YSH10</b>           | F | Human serum | China | 2012.8 | KF711868 | KF711940 | KF711911 | GenBank |
| <b>2012YSC6</b>            | F | Human serum | China | 2012.8 | KF711879 | KF711931 | KF711902 | GenBank |
| <b>2012YSH89</b>           | F | Human serum | China | 2012.8 | KF711873 | KF711935 | KF711906 | GenBank |
| <b>2012YSH16</b>           | F | Human serum | China | 2012.8 | KF711874 | KF711934 | KF711908 | GenBank |



## Supplemental data

|                                 |             |             |       |         |          |          |          |         |
|---------------------------------|-------------|-------------|-------|---------|----------|----------|----------|---------|
| <b>2012YSH14</b>                | F           | Human serum | China | 2012.8  | KF711876 | KF711938 | KF711910 | GenBank |
| <b>2012YSH104</b>               | F           | Human serum | China | 2012.8  | KF711867 | KF711943 | KF711912 | GenBank |
| <b>2012YSH93</b>                | F           | Human serum | China | 2012.8  | KF711866 | KF711946 | KF711913 | GenBank |
| <b>2012YSH105</b>               | F           | Human serum | China | 2012.8  | KF711869 | KF711944 | KF711914 | GenBank |
| <b>2012YSH107</b>               | F           | Human serum | China | 2012.8  | KF711864 | KF711942 | KF711916 | GenBank |
| <b>2012YSH92</b>                | F           | Human serum | China | 2012.8  | KF711865 | KF711941 | KF711917 | GenBank |
| <b>2012YSH27</b>                | F           | Human serum | China | 2012.8  | KF711878 | KF711932 | KF711903 | GenBank |
| <b>JSD1</b>                     | F           | Dog spleen  | China | 2011.1  | JF267783 | JF267784 | JF267785 | GenBank |
| <b>2011YPQ12</b>                | Reassortant | Human serum | China | 2011.8  | KF711880 | KF711930 | KF711915 | GenBank |
| <b>YSC3</b>                     | Reassortant | Human serum | China | 2011.5  | KF356547 | KF356535 | KF356523 | GenBank |
| <b>QD7</b>                      | F           | Human serum | China | 2014.7  | KR706567 | KR706566 | KR706565 | GenBank |
| <b>HNXH</b>                     | A           | Human serum | China | 2014.10 | KT254588 | KT254590 | KT254589 | GenBank |
| <b>HB29</b>                     | D           | Human serum | China | 2010.5  | NC018136 | NC018138 | NC018137 | GenBank |
| <b>ZJZSHH-AM/China/05/2012</b>  | B-3         | Human serum | China | 2012.5  | KR017827 | KR017846 | KR017808 | GenBank |
| <b>ZJZSHH-HYC/China/05/2012</b> | B-3         | Human serum | China | 2012.5  | KR017828 | KR017847 | KR017809 | GenBank |
| <b>ZJZSHH-SHZ/China/05/2012</b> | B-3         | Human serum | China | 2012.5  | KR017829 | KR017848 | KR017810 | GenBank |
| <b>AH-YTY/China/05/2012</b>     | F           | Human serum | China | 2012.5  | KR017830 | KR017849 | KR017811 | GenBank |
| <b>ZJZSHH-LU/China/10/2011</b>  | B-3         | Human serum | China | 2011.10 | KR017831 | KR017850 | KR017812 | GenBank |
| <b>ZJZSHH-ZLD/China/06/2012</b> | B-3         | Human serum | China | 2012.6  | KR017832 | KR017851 | KR017813 | GenBank |
| <b>ZJZSHH-HYJ/China/07/2012</b> | B-3         | Human serum | China | 2012.6  | KR017833 | KR017852 | KR017814 | GenBank |
| <b>ZJZSHH-XAM/China/06/2012</b> | B-3         | Human serum | China | 2012.6  | KR017834 | KR017853 | KR017815 | GenBank |
| <b>ZJZSHH-WSH/China/08/2012</b> | A           | Human serum | China | 2012.8  | KR017835 | KR017854 | KR017816 | GenBank |
| <b>ZJZSHH-HCY/China/06/2012</b> | B-3         | Human serum | China | 2012.6  | KR017836 | KR017855 | KR017817 | GenBank |
| <b>ZJZSHH-</b>                  | B-3         | Human serum | China | 2012.6  | KR017837 | KR017856 | KR017818 | GenBank |

## Supplemental data

|                                  |             |                                  |       |        |          |          |          |         |
|----------------------------------|-------------|----------------------------------|-------|--------|----------|----------|----------|---------|
| <b>ZLN/China/06/2012</b>         |             |                                  |       |        |          |          |          |         |
| <b>ZJZSHH-LHZH/China/06/2012</b> | B-3         | Human serum                      | China | 2012.6 | KR017838 | KR017857 | KR017819 | GenBank |
| <b>ZJZSHH-CXD/China/05/2012</b>  | A           | Human serum                      | China | 2012.5 | KR017839 | KR017858 | KR017820 | GenBank |
| <b>ZJZSHH-FDE/China/06/2012</b>  | B-3         | Human serum                      | China | 2012.6 | KR017840 | KR017859 | KR017821 | GenBank |
| <b>ZJZSHH-YJX/China/06/2012</b>  | B-1         | Human serum                      | China | 2012.6 | KR017841 | KR017860 | KR017822 | GenBank |
| <b>ZJZSHH-FZHR/China/07/2013</b> | A           | Human serum                      | China | 2013.7 | KR017843 | KR017862 | KR017824 | GenBank |
| <b>ZJZSHH-LWL/China/08/2014</b>  | B-3         | Human serum                      | China | 2014.8 | KR017844 | KR017863 | KR017825 | GenBank |
| <b>ZJZSHH-WRF/China/08/2014</b>  | B-3         | Human serum                      | China | 2014.8 | KR017845 | KR017864 | KR017826 | GenBank |
| <b>JS2014-Hedgehog-02</b>        | F           | Erinaceus europaeus serum        | China | 2014.6 | KR230769 | KR230789 | KR230809 | GenBank |
| <b>JS2014-Hedgehog-01</b>        | A           | Erinaceus europaeus serum        | China | 2014.1 | KR230768 | KR230788 | KR230808 | GenBank |
| <b>JS2014-H.longicornis-03</b>   | F           | <i>Haemaphysalis longicornis</i> | China | 2014.6 | KR230767 | KR230787 | KR230807 | GenBank |
| <b>JS2014-H.longicornis-02</b>   | F           | <i>Haemaphysalis longicornis</i> | China | 2014.6 | KR230766 | KR230786 | KR230806 | GenBank |
| <b>JS2014-H.longicornis-01</b>   | Reassortant | <i>Haemaphysalis longicornis</i> | China | 2014.6 | KR230765 | KR230785 | KR230805 | GenBank |
| <b>JS2014-39</b>                 | Reassortant | Human serum                      | China | 2014.6 | KR230764 | KR230784 | KR230804 | GenBank |
| <b>JS2014-33</b>                 | F           | Human serum                      | China | 2014.6 | KR230763 | KR230783 | KR230803 | GenBank |
| <b>JS2014-31</b>                 | F           | Human serum                      | China | 2014.5 | KR230762 | KR230782 | KR230802 | GenBank |
| <b>JS2014-18</b>                 | A           | Human serum                      | China | 2014.5 | KR230761 | KR230781 | KR230801 | GenBank |
| <b>JS2014-16</b>                 | Reassortant | Human serum                      | China | 2014.4 | KR230760 | KR230780 | KR230800 | GenBank |
| <b>JS2014-15</b>                 | A           | Human serum                      | China | 2014.4 | KR230759 | KR230779 | KR230799 | GenBank |
| <b>JS2014-03</b>                 | F           | Human serum                      | China | 2014.4 | KR230758 | KR230778 | KR230798 | GenBank |

Supplemental data

|                           |     |             |       |        |          |          |          |         |
|---------------------------|-----|-------------|-------|--------|----------|----------|----------|---------|
| <b><i>JS2013-71</i></b>   | A   | Human serum | China | 2013.7 | KR230757 | KR230777 | KR230797 | GenBank |
| <b><i>JS2013-52</i></b>   | F   | Human serum | China | 2013.6 | KR230755 | KR230775 | KR230795 | GenBank |
| <b><i>JS2013-46</i></b>   | A   | Human serum | China | 2013.6 | KR230754 | KR230774 | KR230794 | GenBank |
| <b><i>JS2013-44</i></b>   | F   | Human serum | China | 2013.6 | KR230753 | KR230773 | KR230793 | GenBank |
| <b><i>JS2012-79</i></b>   | F   | Human serum | China | 2012.7 | KR230752 | KR230772 | KR230792 | GenBank |
| <b><i>JS2011-69</i></b>   | B-3 | Human serum | China | 2011.7 | KR230751 | KR230771 | KR230791 | GenBank |
| <b><i>JS2011-13-2</i></b> | A   | Human serum | China | 2011.5 | KR230750 | KR230770 | KR230790 | GenBank |

NA, not available.
